# Supplementary material for: Pancreatic Islet Protein Complexes and Their Dysregulation in Type 2 Diabetes
Source: PubMed Central journal article supplement (PMC5397424; doi:10.3389/fgene.2017.00043), 2017-04-20
Supplement: DataSheet1.pdf [file DataSheet1.pdf]

## Islet diabetic phenotype gene sets

Color legend:

- T2D expression (C)
- T2D expression (B)
- Glycemic gene-based
- Co-expression
- T2D eQTL
- T2D expression (A)
- Hyperglycemia expression
- T2D methylation (B)
- T2D methylation (A)
- Monogenic
- OMIM
- T2D GWAS/rare variant
- Glycemic GWAS/rare variant

## Islet biology gene sets

Color legend:

- Islet specific
- Open chromatin
- Open chromatin clusters
- Islet biology

**Visualization of the 24 complexes with potential T2D dysregulation, where the evidence sources supporting the different genes are annotated.**

The first page (of the 25 pages) in this file shows the color legend for the diabetic phenotype and islet related gene sets. Nodes with red boarder indicate targets of FDA approved drugs.

**Complex-1**

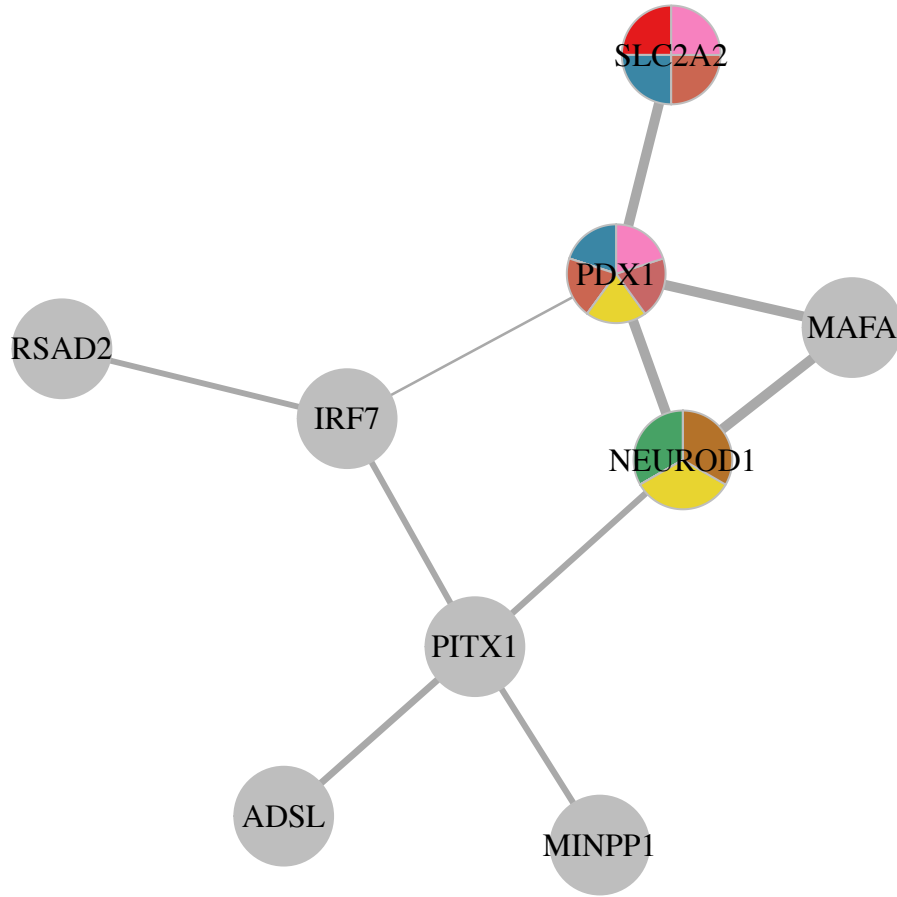

Emperical P-value:  $< 1E-5$   
Number of genes in complex: 9  
Top coordinated expressed tissues: Colon, Skin, Bone Marrow  
Node color based on: Islet diabetic phenotype gene sets

**Complex-1**

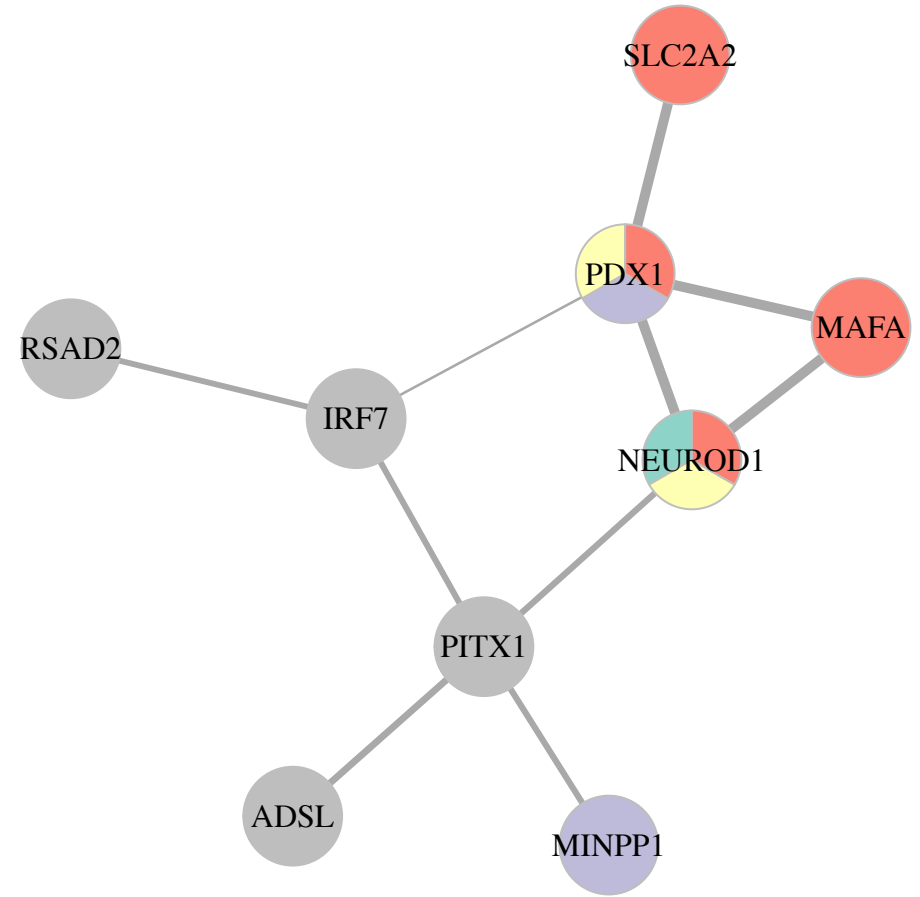

Emperical P-value:  $< 1E-5$   
Number of genes in complex: 9  
Top coordinated expressed tissues: Colon, Skin, Bone Marrow  
Node color based on: Islet biology gene sets

### Complex-2

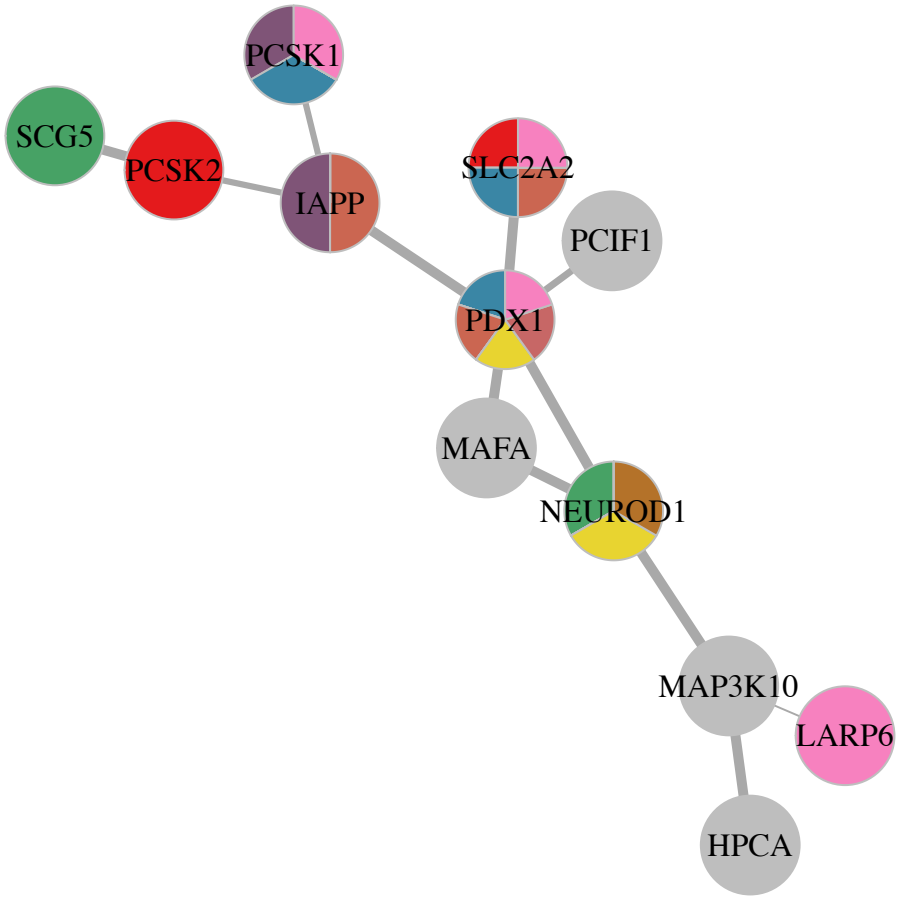

Emperical P-value:  $< 1E-5$   
Number of genes in complex: 12  
Top coordinated expressed tissues: islet, Pituitary, Pancreas

Node color based on: Islet diabetic phenotype gene sets

### Complex-2

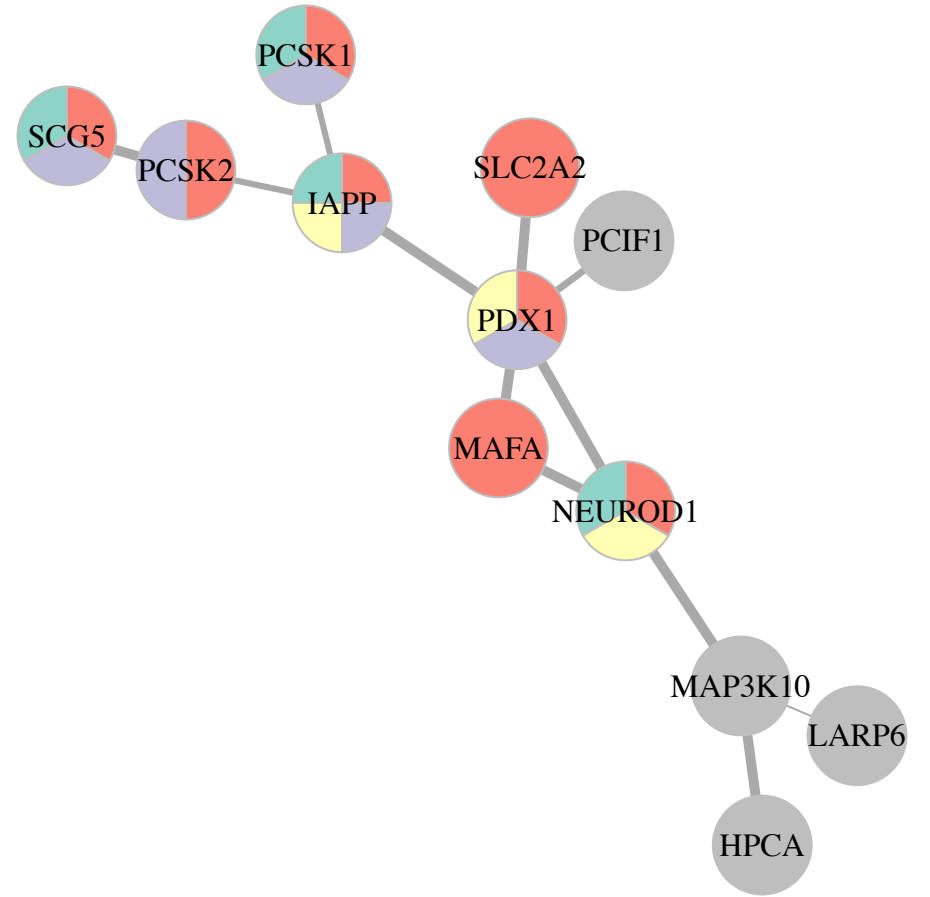

Emperical P-value:  $< 1E-5$   
Number of genes in complex: 12  
Top coordinated expressed tissues: islet, Pituitary, Pancreas

Node color based on: Islet biology gene sets

### Complex-3

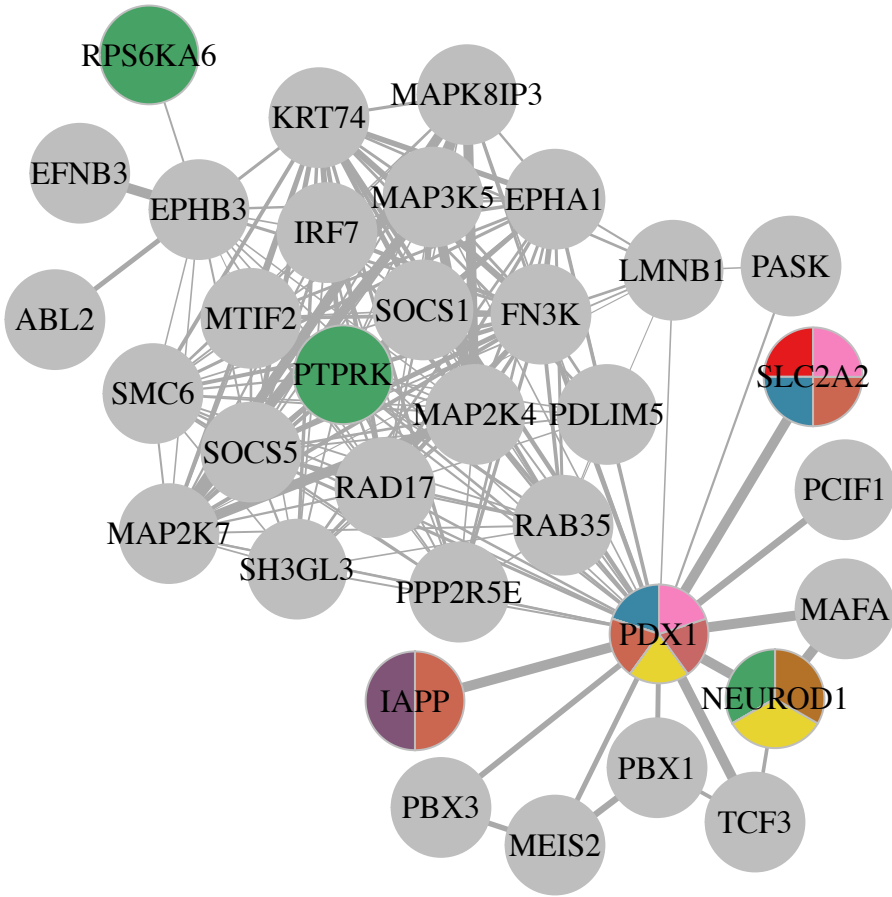

Emperical P-value:  $2e-05$   
Number of genes in complex: 34  
Top coordinated expressed tissues: Bladder, Ovary, Breast

Node color based on: Islet diabetic phenotype gene sets

### Complex-3

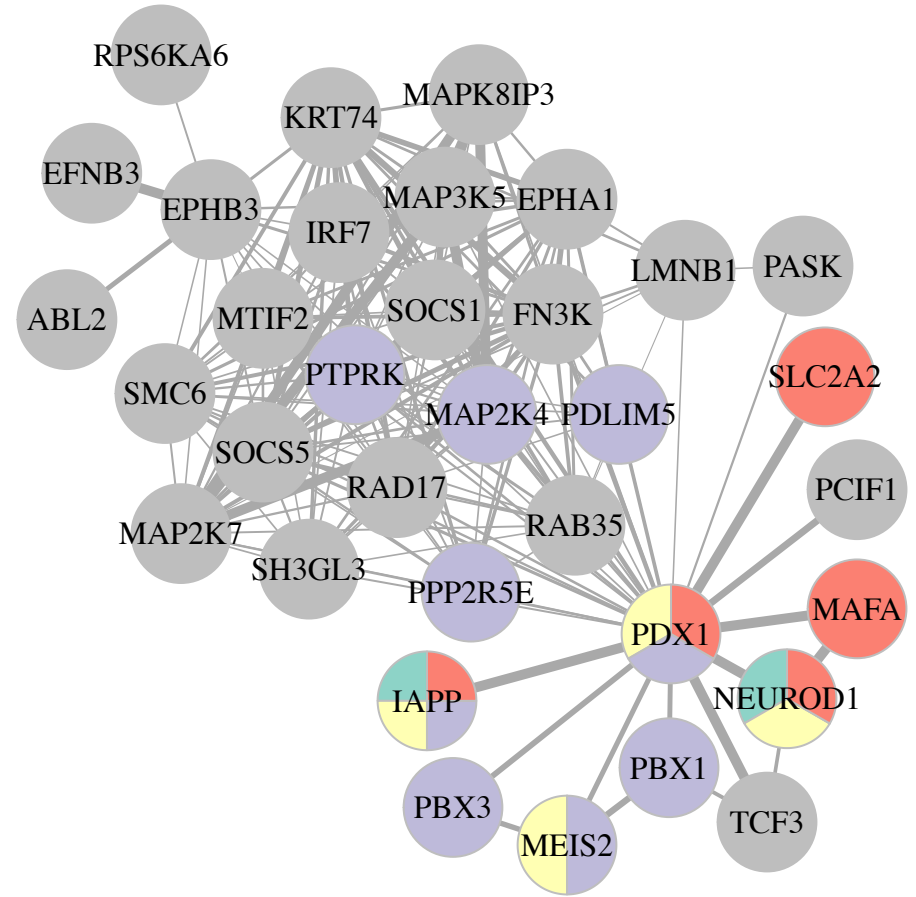

Emperical P-value:  $2e-05$   
Number of genes in complex: 34  
Top coordinated expressed tissues: Bladder, Ovary, Breast

Node color based on: Islet biology gene sets

### Complex-4

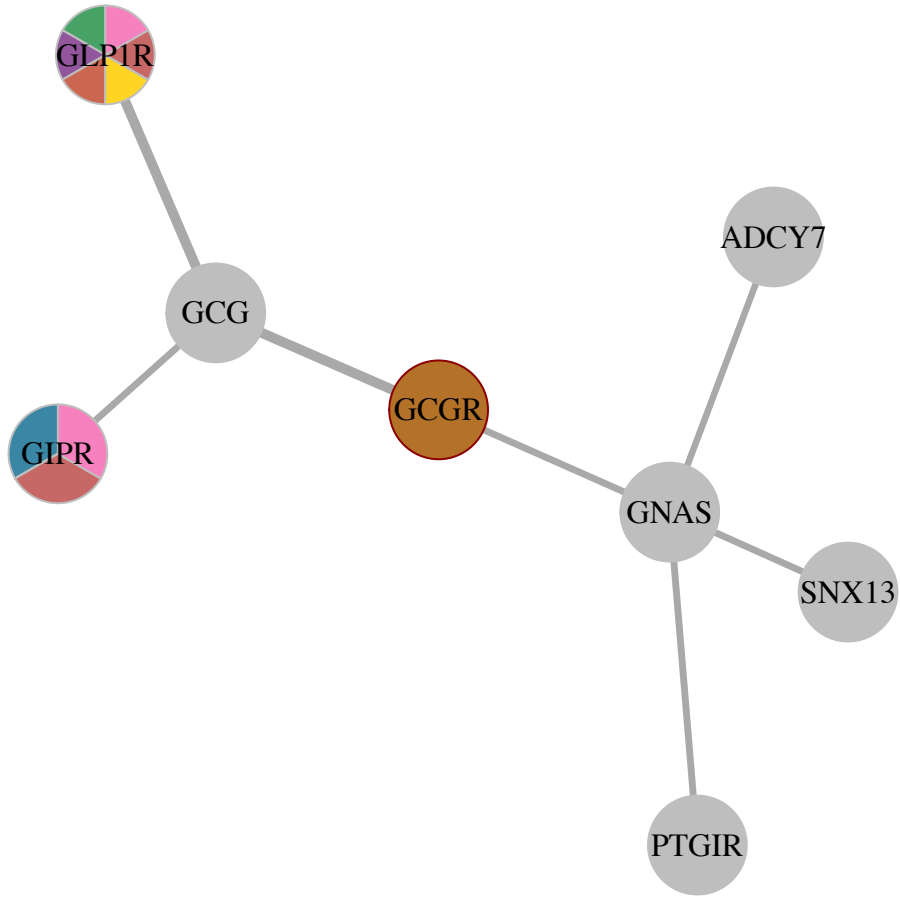

Emperical P-value:  $3e-05$   
Number of genes in complex: 8  
Top coordinated expressed tissues: islet, Pancreas, Small Intestine

Node color based on: Islet diabetic phenotype gene sets

### Complex-4

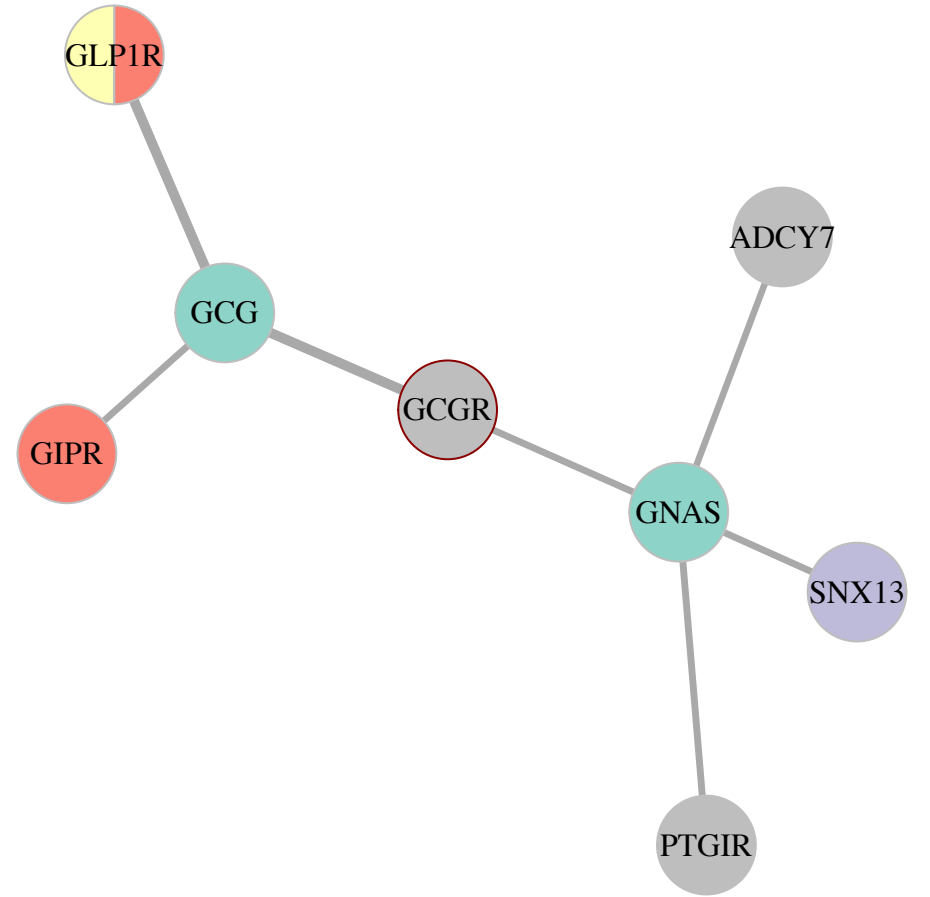

Emperical P-value:  $3e-05$   
Number of genes in complex: 8  
Top coordinated expressed tissues: islet, Pancreas, Small Intestine

Node color based on: Islet biology gene sets

### Complex-5

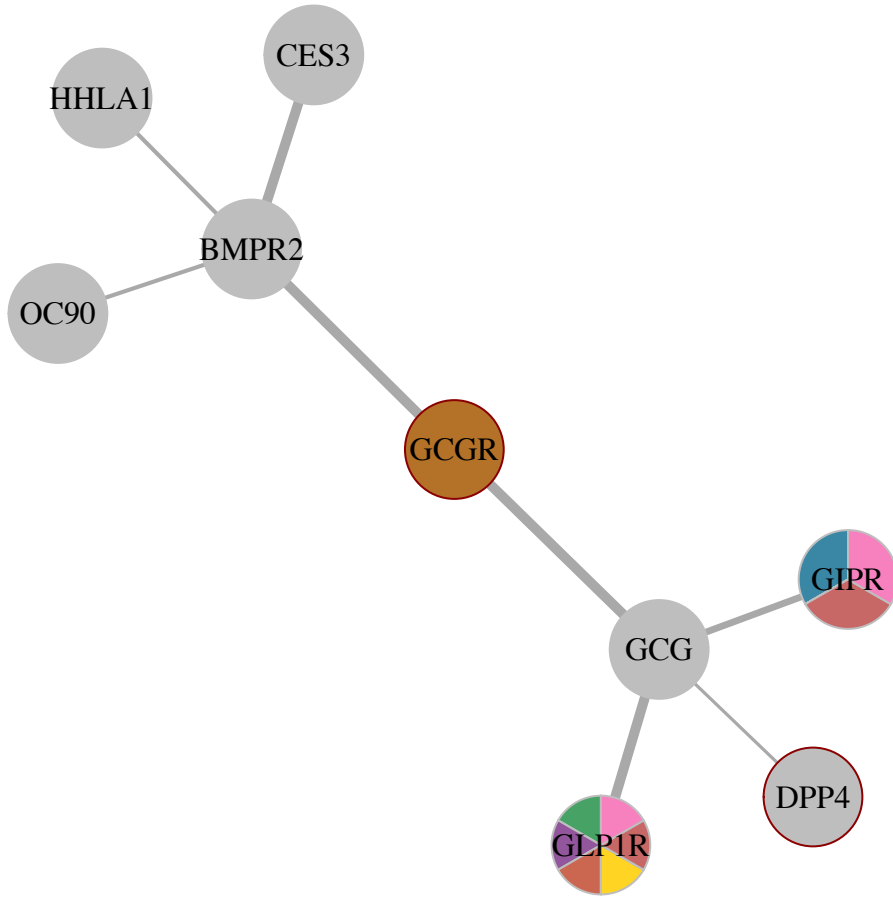

Emperical P-value:  $3e-05$   
Number of genes in complex: 9  
Top coordinated expressed tissues: islet, beta, Bone Marrow  
Node color based on: Islet diabetic phenotype gene sets

### Complex-5

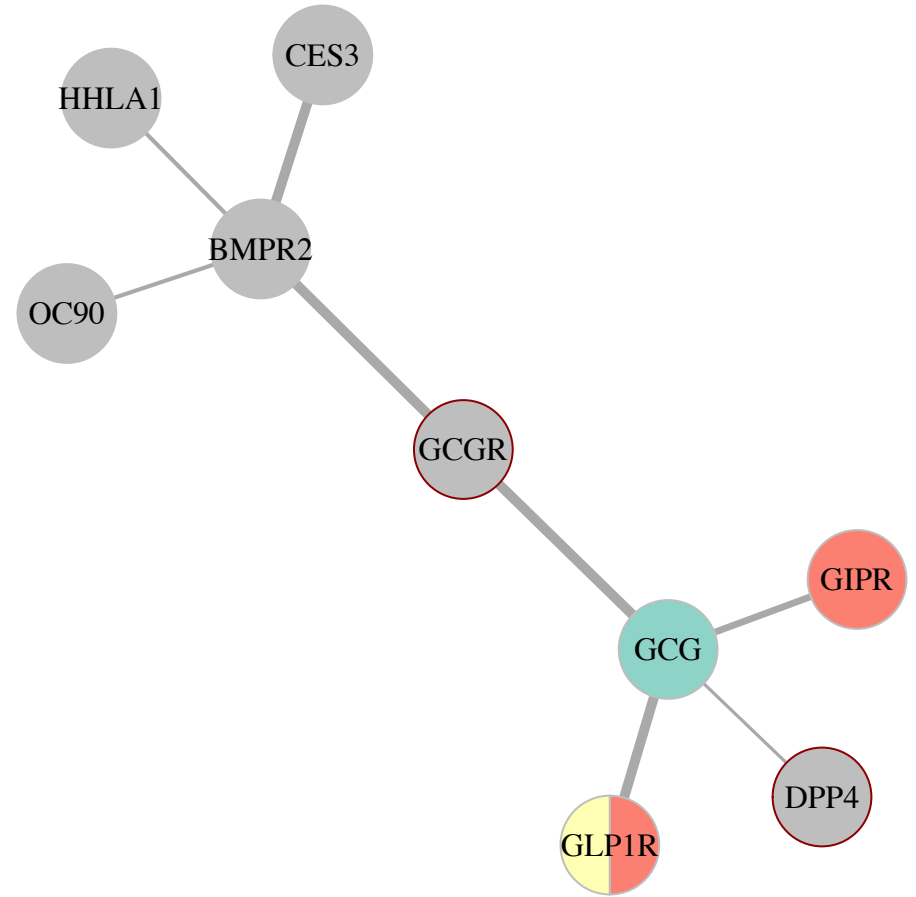

Emperical P-value:  $3e-05$   
Number of genes in complex: 9  
Top coordinated expressed tissues: islet, beta, Bone Marrow  
Node color based on: Islet biology gene sets

### Complex-6

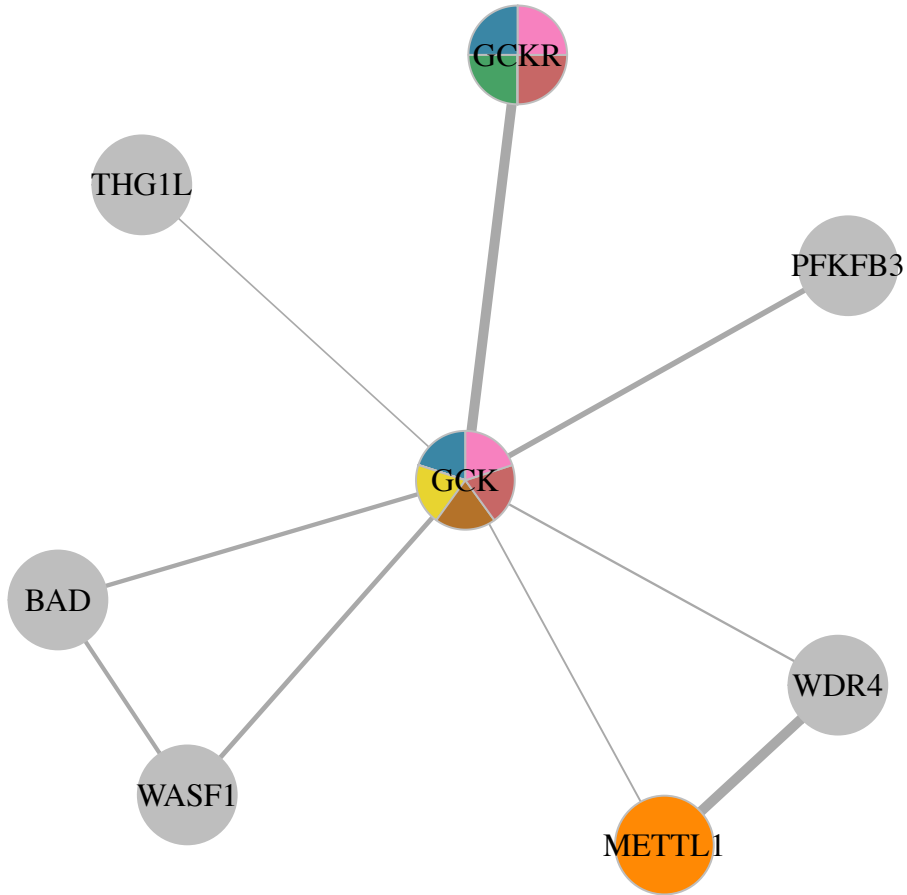

Emperical P-value:  $3e-05$   
Number of genes in complex: 8  
Top coordinated expressed tissues: Nerve, Cervix Uteri, Small Intestine  
Node color based on: Islet diabetic phenotype gene sets

### Complex-6

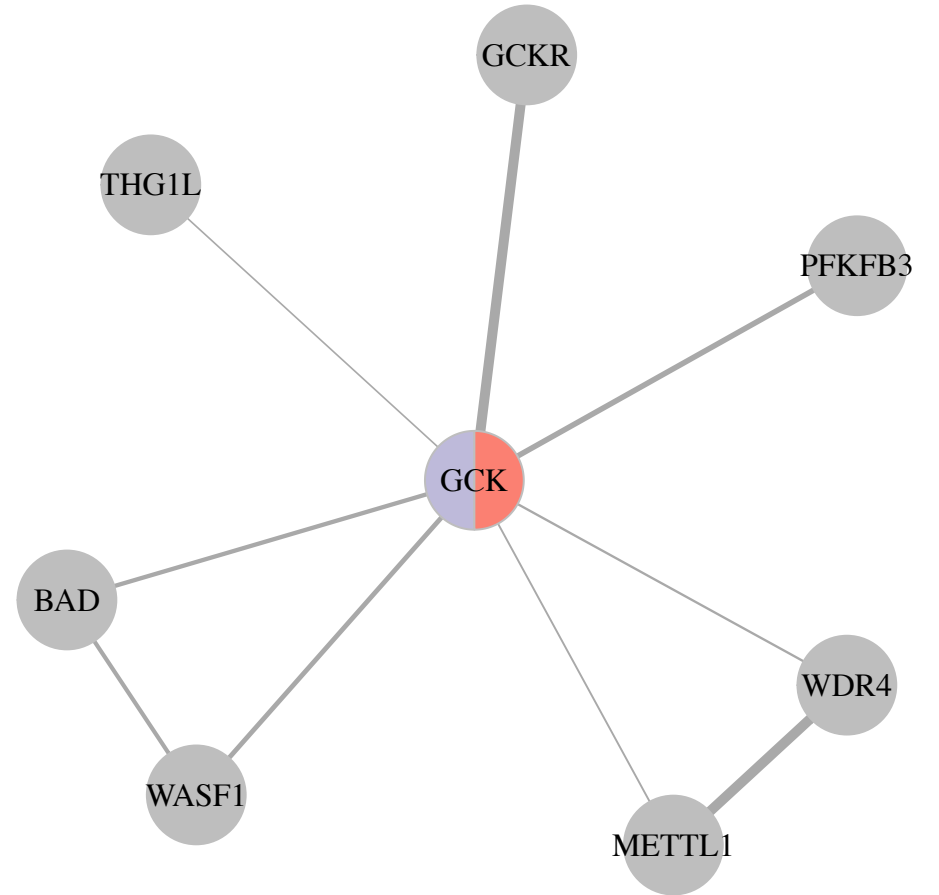

Emperical P-value:  $3e-05$   
Number of genes in complex: 8  
Top coordinated expressed tissues: Nerve, Cervix Uteri, Small Intestine  
Node color based on: Islet biology gene sets

### Complex-7

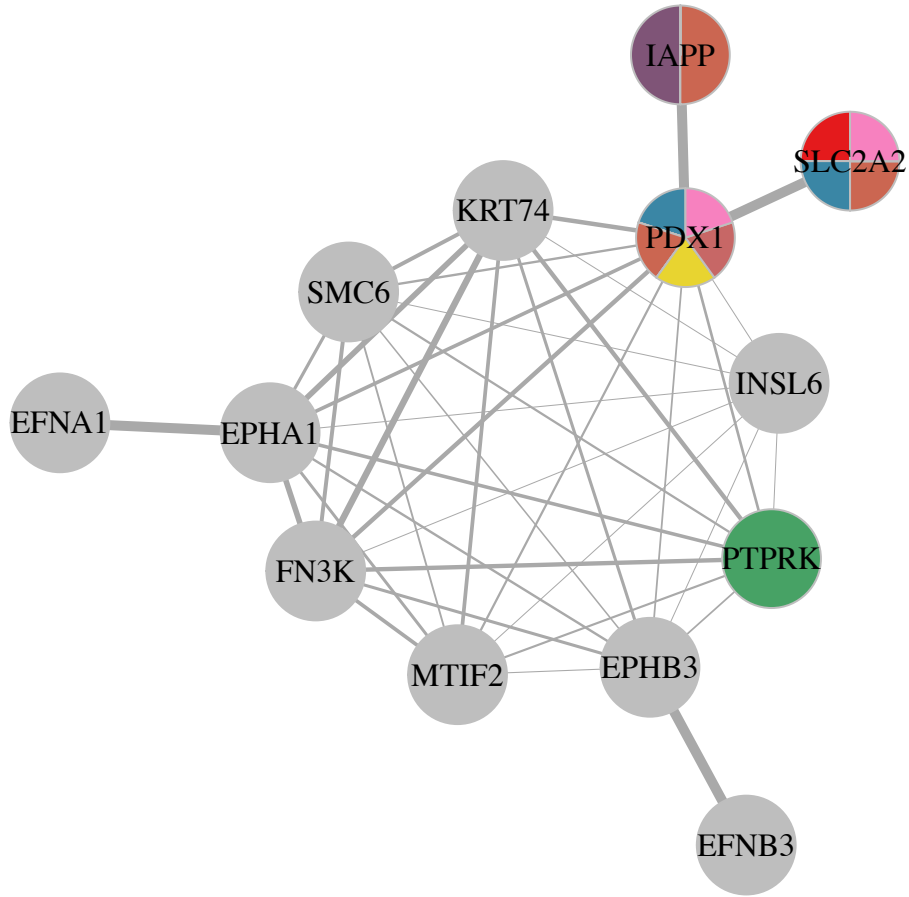

Emperical P-value:  $4e-05$   
Number of genes in complex: 13  
Top coordinated expressed tissues: Colon, Bladder, nonbeta  
Node color based on: Islet diabetic phenotype gene sets

### Complex-7

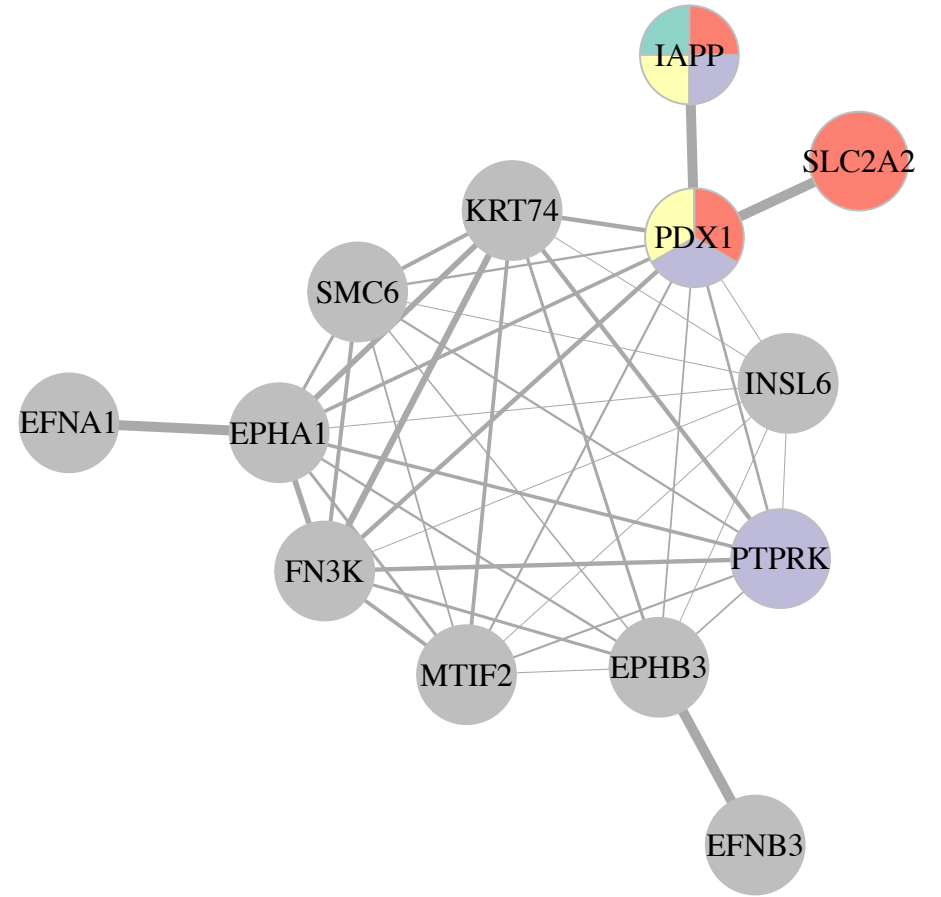

Emperical P-value:  $4e-05$   
Number of genes in complex: 13  
Top coordinated expressed tissues: Colon, Bladder, nonbeta  
Node color based on: Islet biology gene sets



### Complex-8

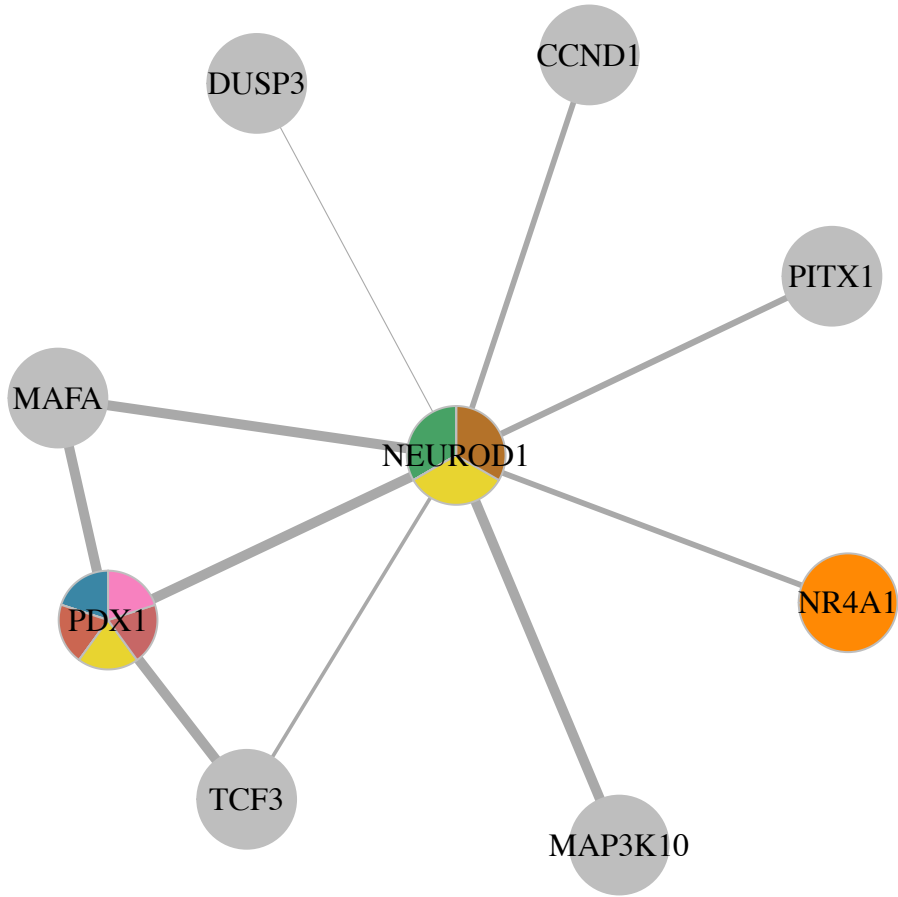

Emperical P-value:  $4e-05$   
Number of genes in complex: 9  
Top coordinated expressed tissues: Skin, Colon, Adrenal Gland  
Node color based on: Islet diabetic phenotype gene sets

### Complex-8

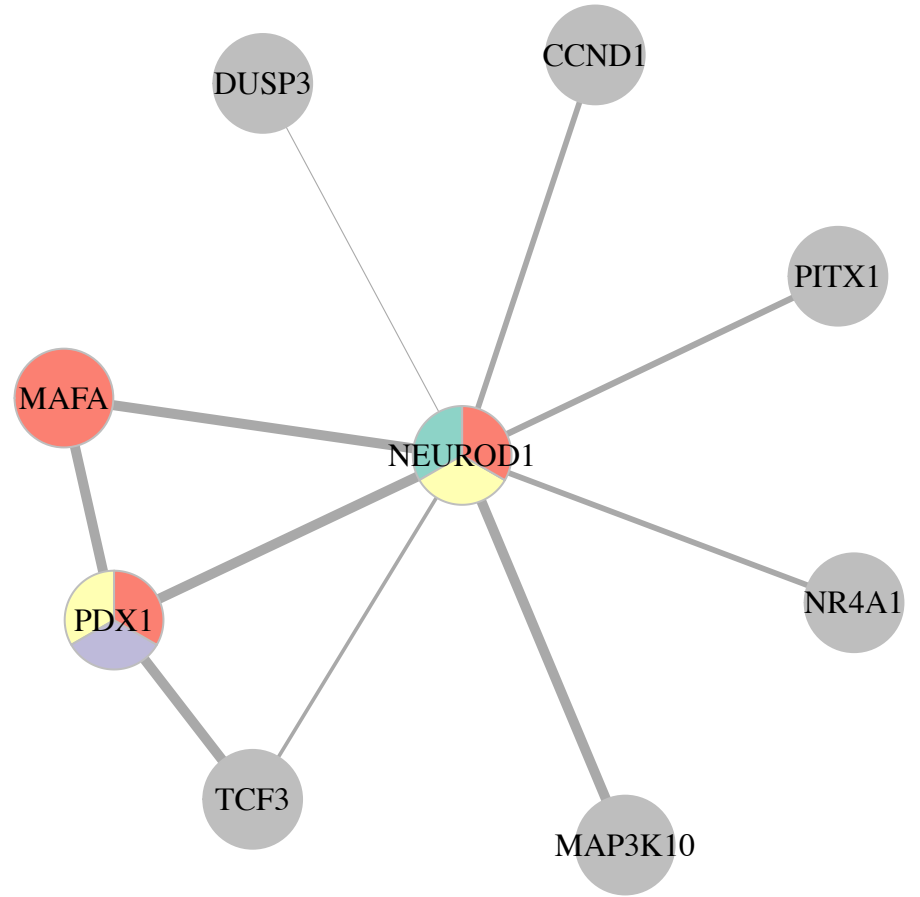

Emperical P-value:  $4e-05$   
Number of genes in complex: 9  
Top coordinated expressed tissues: Skin, Colon, Adrenal Gland  
Node color based on: Islet biology gene sets

### Complex-9

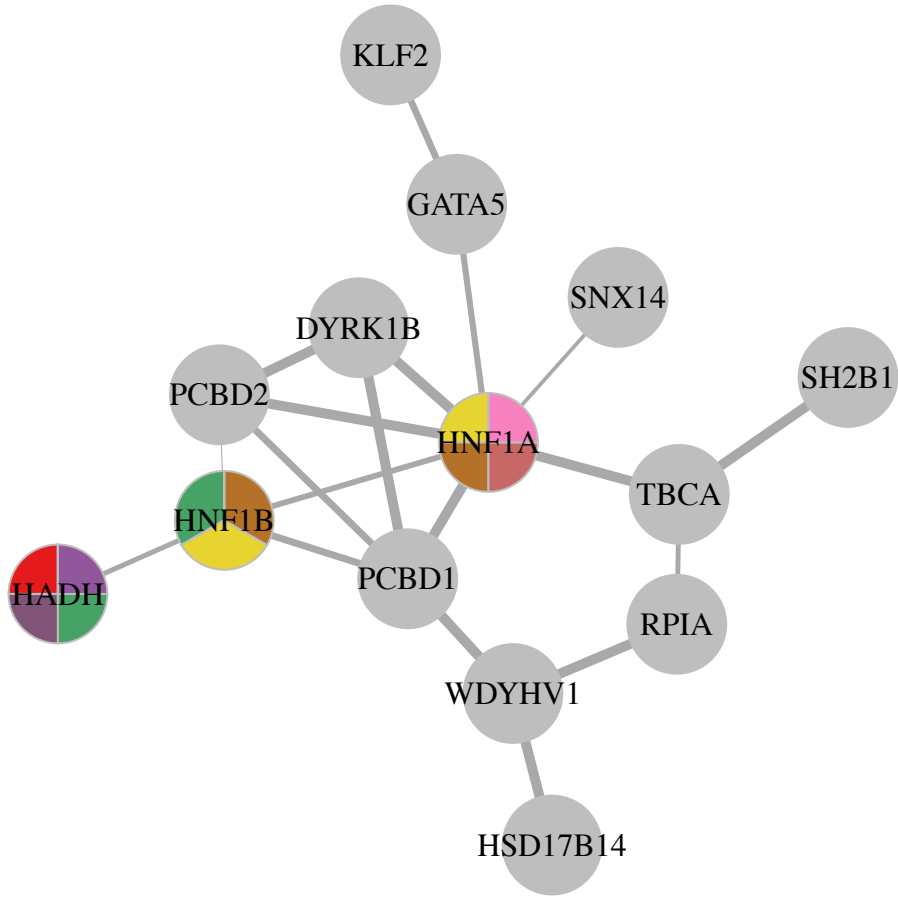

Emperical P-value:  $5e-05$   
Number of genes in complex: 14  
Top coordinated expressed tissues: Fallopian Tube, Uterus, Bladder

Node color based on: Islet diabetic phenotype gene sets

### Complex-9

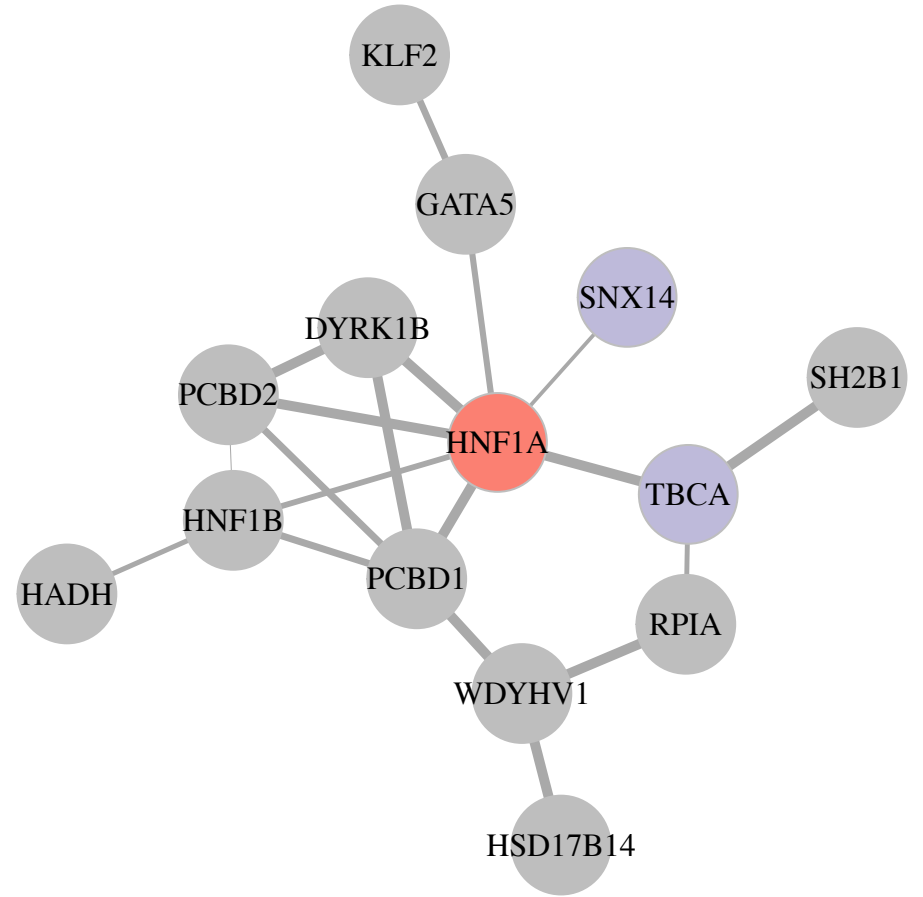

Emperical P-value:  $5e-05$   
Number of genes in complex: 14  
Top coordinated expressed tissues: Fallopian Tube, Uterus, Bladder

Node color based on: Islet biology gene sets

### Complex-10

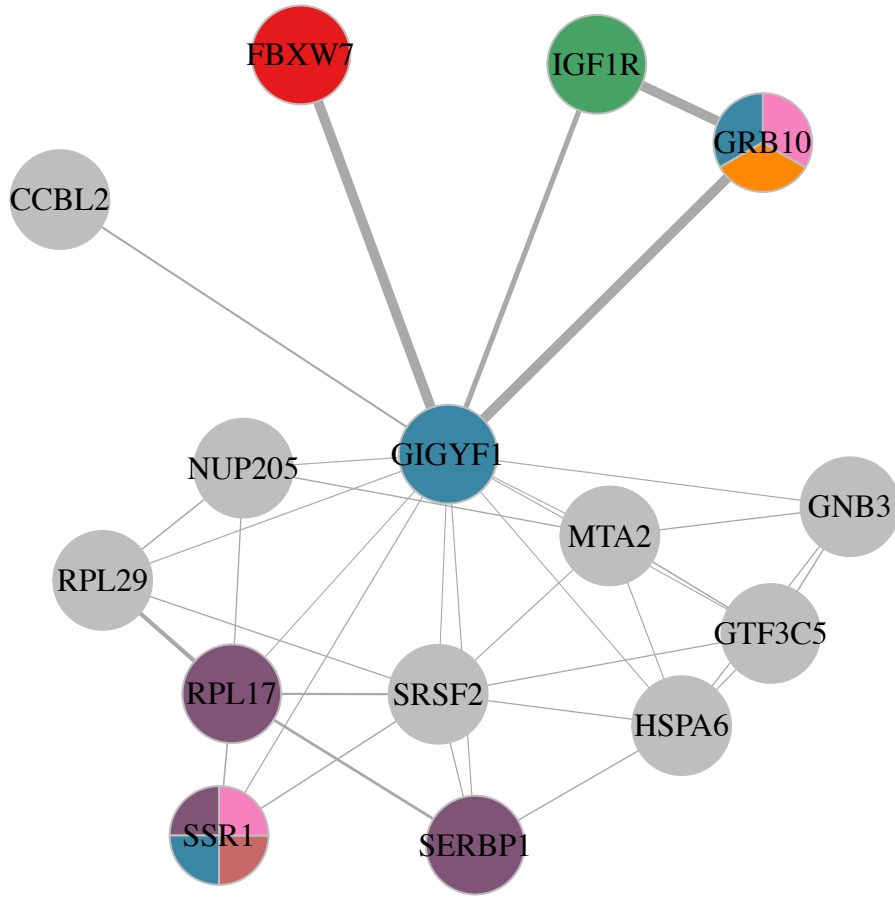

Emperical P-value:  $6e-05$   
Number of genes in complex: 15  
Top coordinated expressed tissues: Small Intestine, Liver, Brain

Node color based on: Islet diabetic phenotype gene sets

### Complex-10

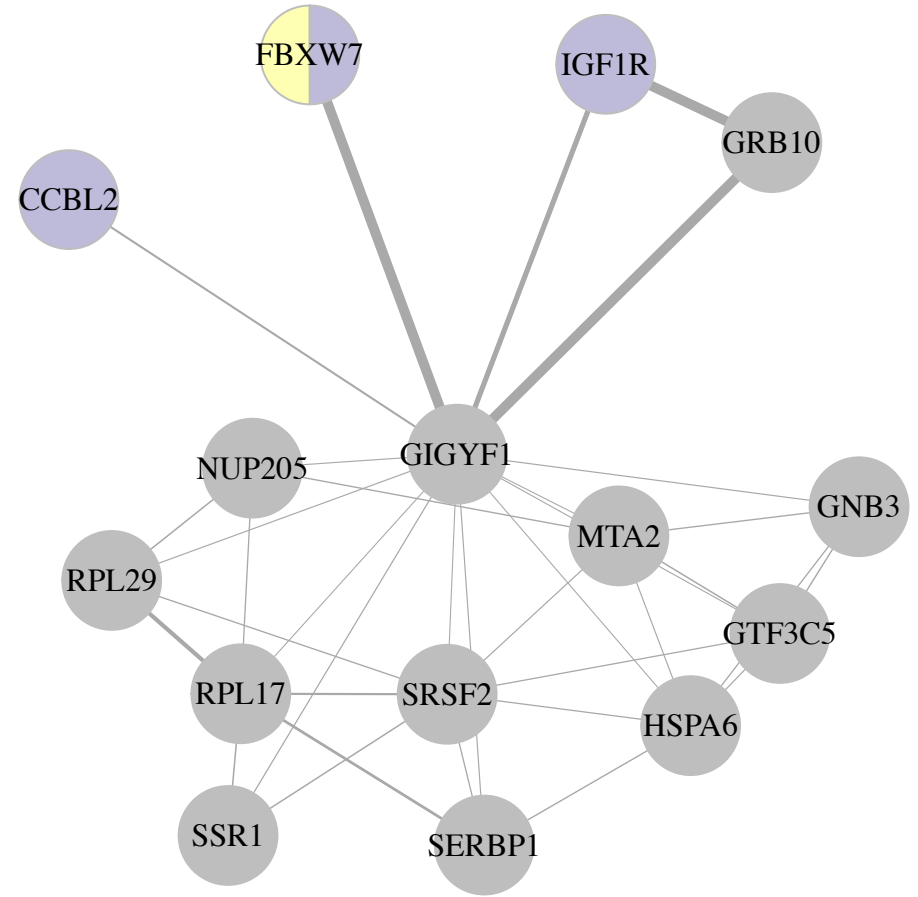

Emperical P-value:  $6e-05$   
Number of genes in complex: 15  
Top coordinated expressed tissues: Small Intestine, Liver, Brain

Node color based on: Islet biology gene sets

### Complex-11

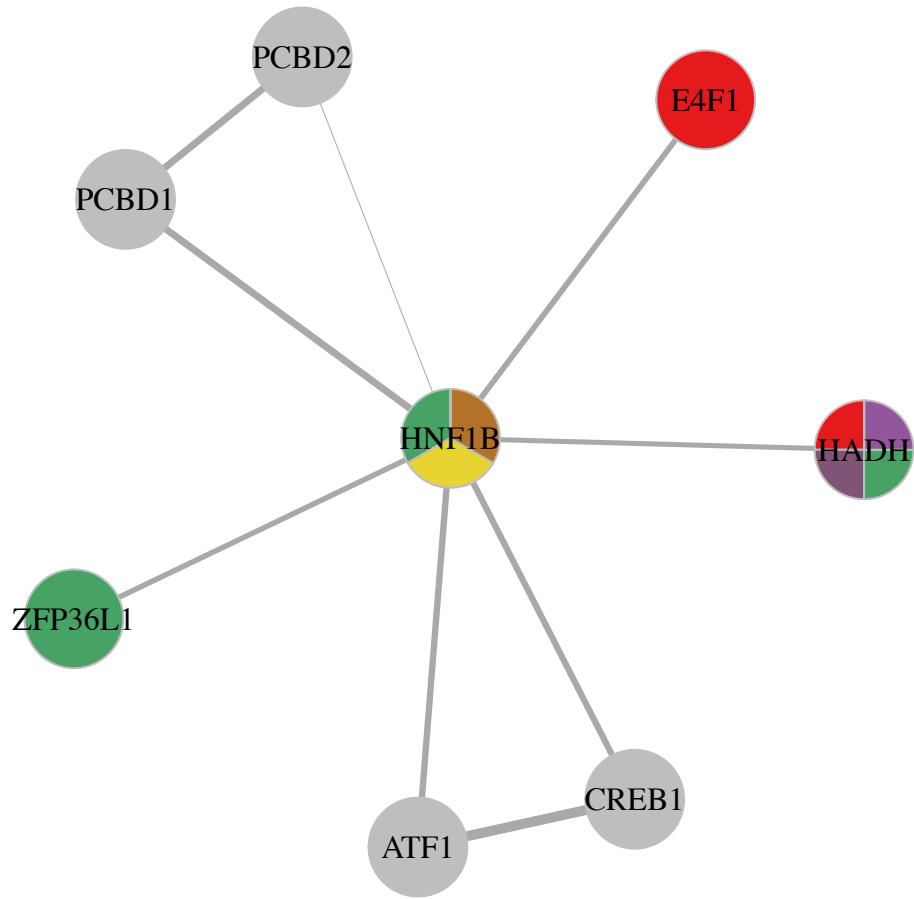

Emperical P-value:  $6e-05$   
Number of genes in complex: 8  
Top coordinated expressed tissues: Bladder, Fallopan Tube, Prostate  
Node color based on: Islet diabetic phenotype gene sets

### Complex-11

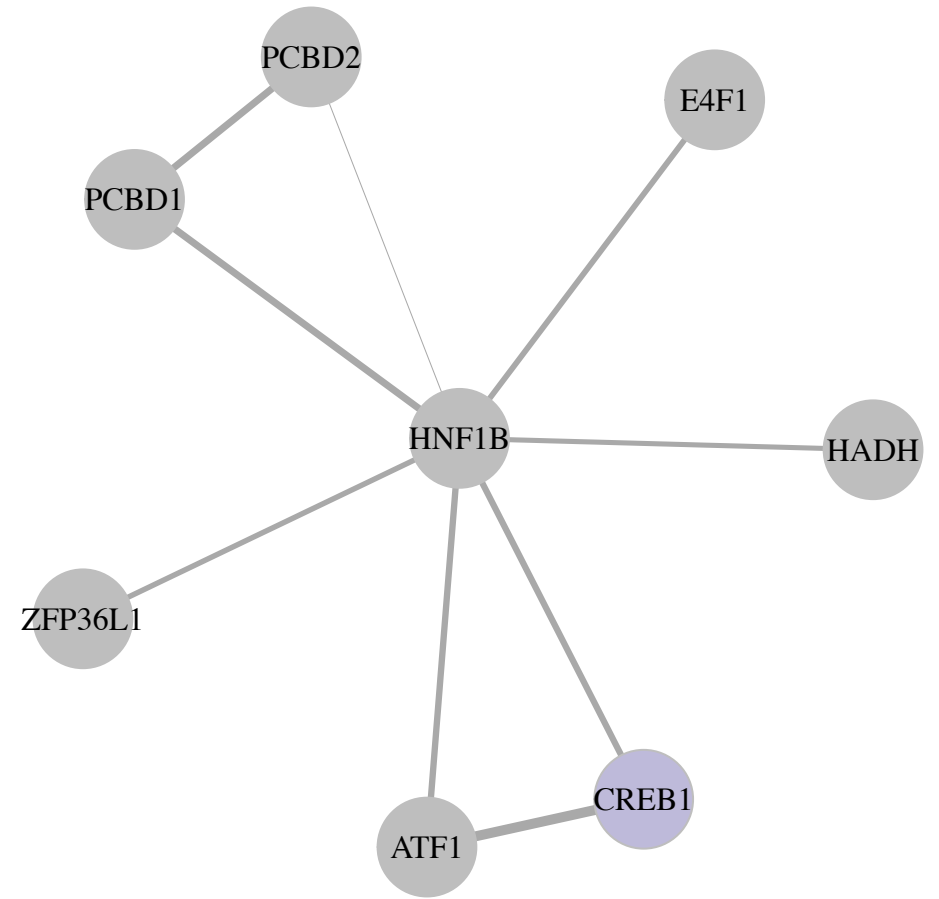

Emperical P-value:  $6e-05$   
Number of genes in complex: 8  
Top coordinated expressed tissues: Bladder, Fallopan Tube, Prostate  
Node color based on: Islet biology gene sets

### Complex-12

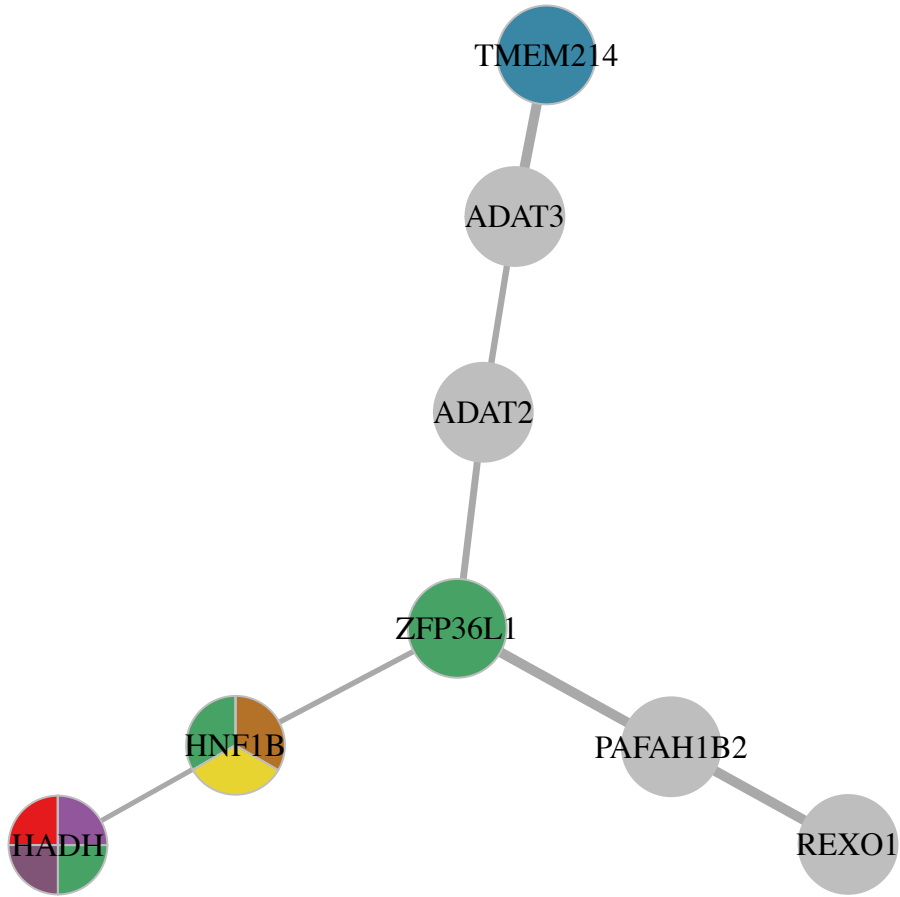

Emperical P-value:  $6e-05$

Number of genes in complex: 8

Top coordinated expressed tissues: Bladder, Fallopian Tube, Cervix Uteri

Node color based on: Islet diabetic phenotype gene sets

### Complex-12

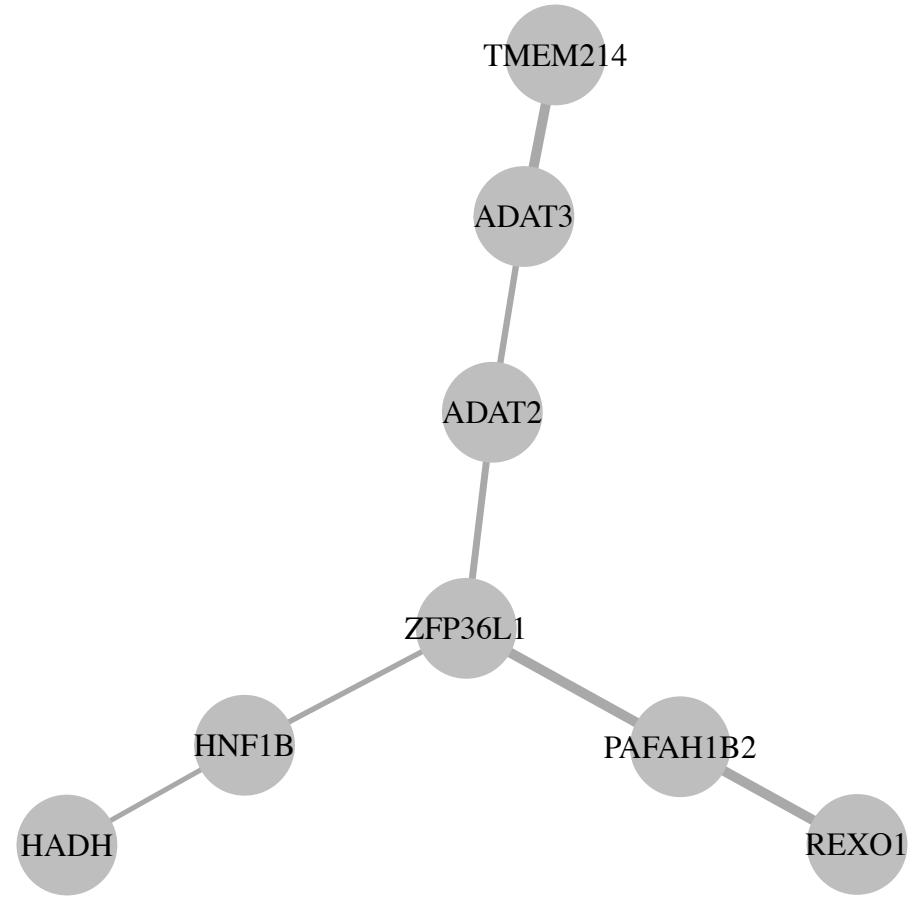

Emperical P-value:  $6e-05$

Number of genes in complex: 8

Top coordinated expressed tissues: Bladder, Fallopian Tube, Cervix Uteri

Node color based on: Islet biology gene sets

### Complex-13

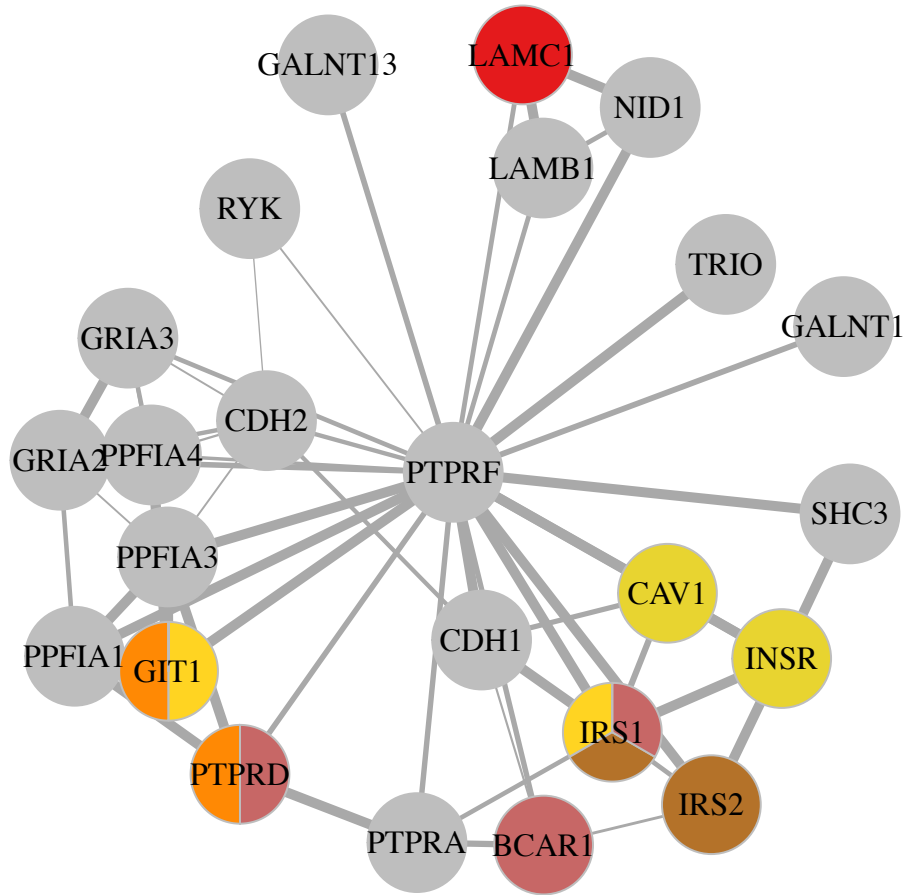

Emperical P-value:  $7e-05$   
Number of genes in complex: 24  
Top coordinated expressed tissues: beta, islet, Testis

Node color based on: Islet diabetic phenotype gene sets

### Complex-13

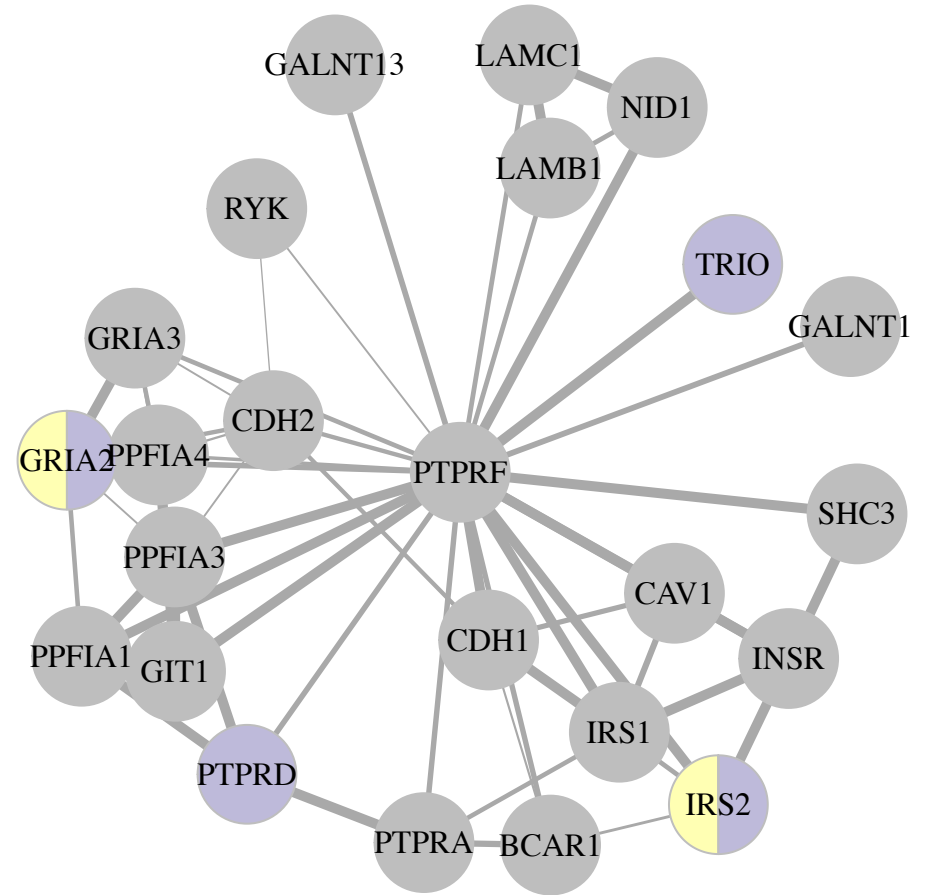

Emperical P-value:  $7e-05$   
Number of genes in complex: 24  
Top coordinated expressed tissues: beta, islet, Testis

Node color based on: Islet biology gene sets

### Complex-14

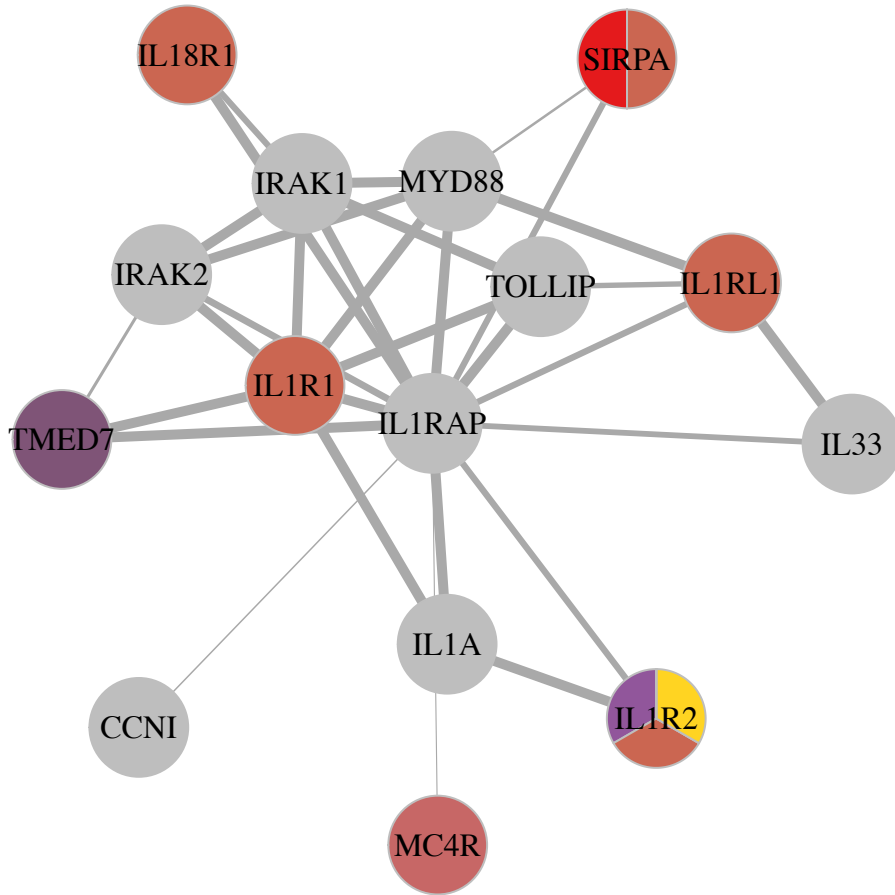

Emperical P-value:  $9e-05$   
Number of genes in complex: 15  
Top coordinated expressed tissues: Fallopian Tube, Nerve, Blood Vessel  
Node color based on: Islet diabetic phenotype gene sets

### Complex-14

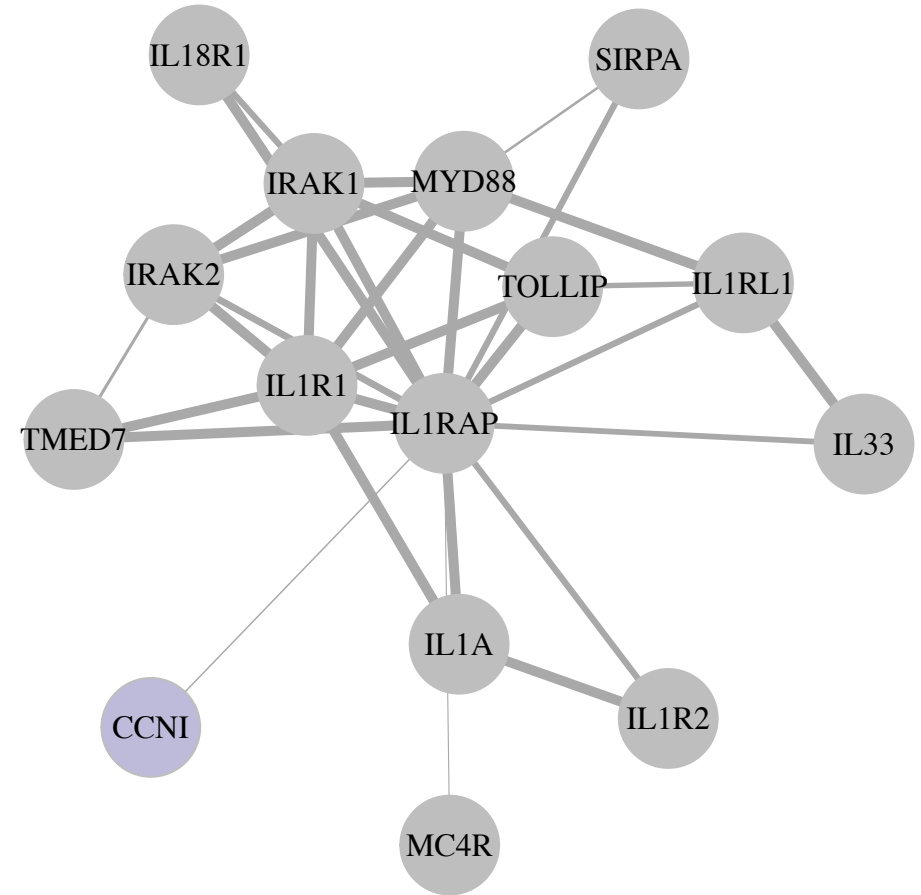

Emperical P-value:  $9e-05$   
Number of genes in complex: 15  
Top coordinated expressed tissues: Fallopian Tube, Nerve, Blood Vessel  
Node color based on: Islet biology gene sets

### Complex-15

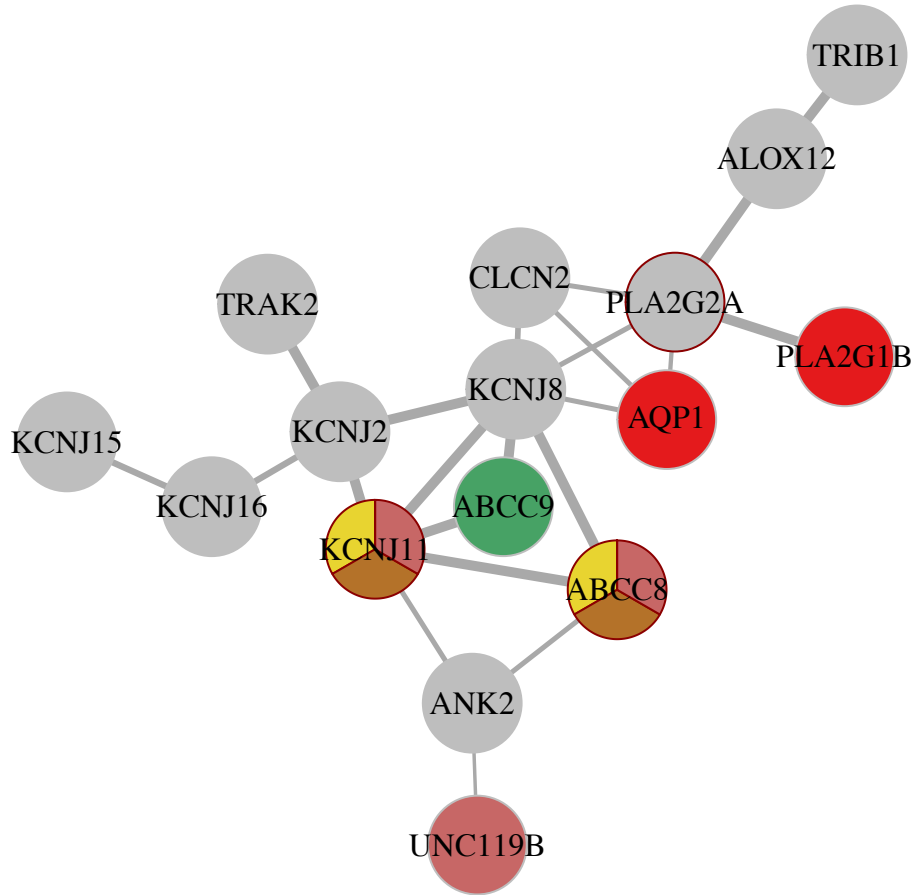

Emperical P-value:  $9e-05$   
Number of genes in complex: 16  
Top coordinated expressed tissues: Salivary Gland, islet, Bone Marrow  
Node color based on: Islet diabetic phenotype gene sets

### Complex-15

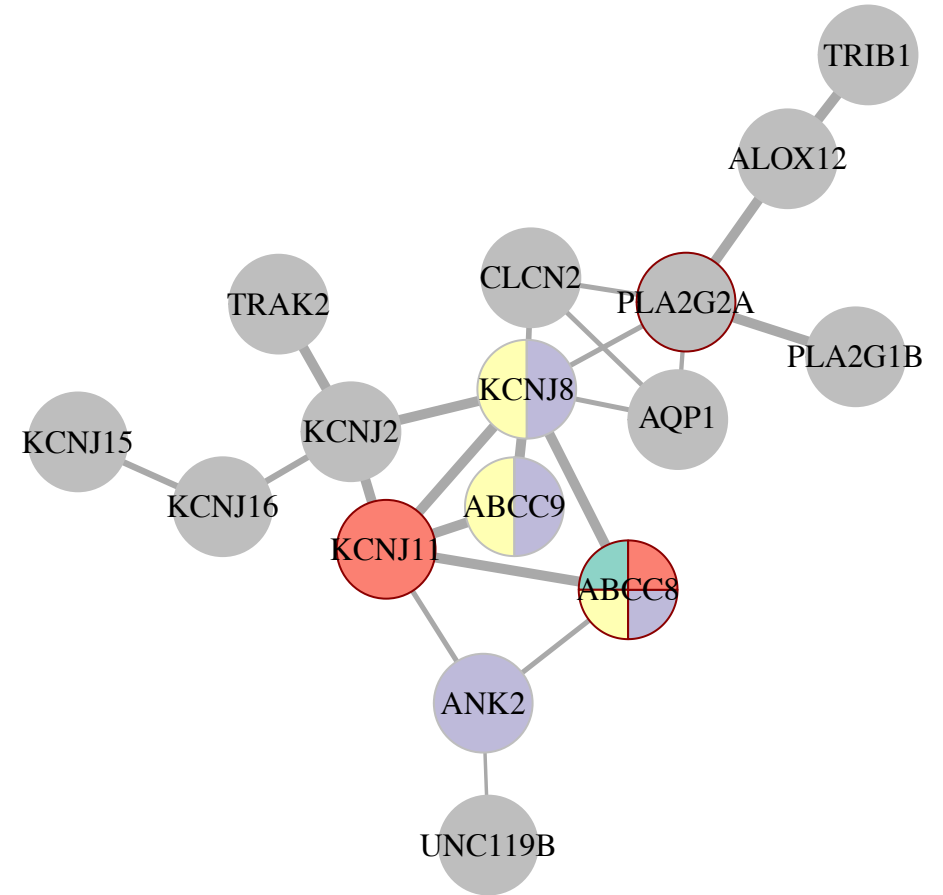

Emperical P-value:  $9e-05$   
Number of genes in complex: 16  
Top coordinated expressed tissues: Salivary Gland, islet, Bone Marrow  
Node color based on: Islet biology gene sets



### Complex-16

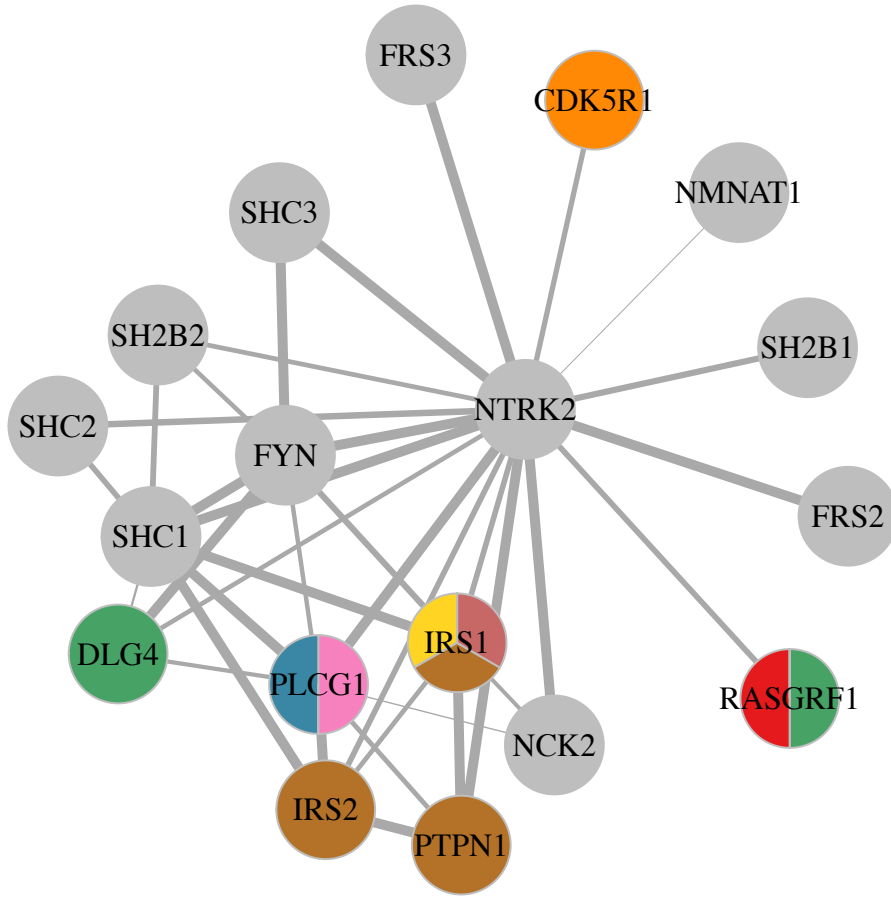

Emperical P-value:  $1e-04$   
Number of genes in complex: 18  
Top coordinated expressed tissues: Stomach, Vagina, Colon  
Node color based on: Islet diabetic phenotype gene sets

### Complex-16

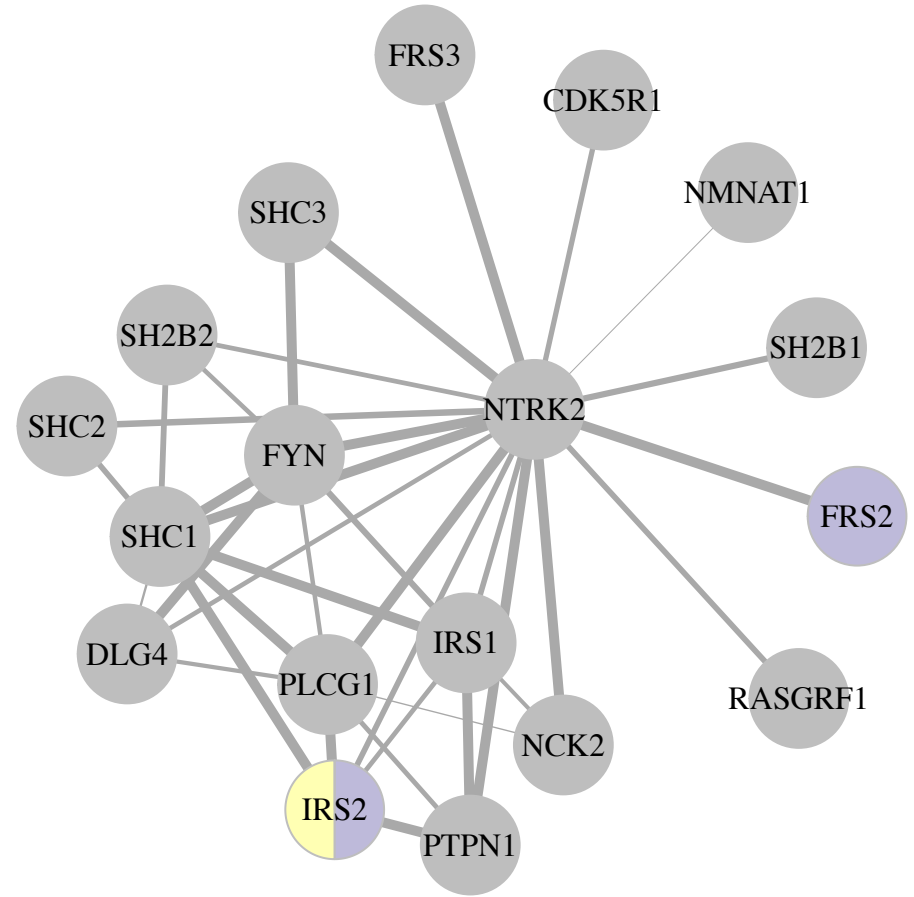

Emperical P-value:  $1e-04$   
Number of genes in complex: 18  
Top coordinated expressed tissues: Stomach, Vagina, Colon  
Node color based on: Islet biology gene sets

### Complex-17

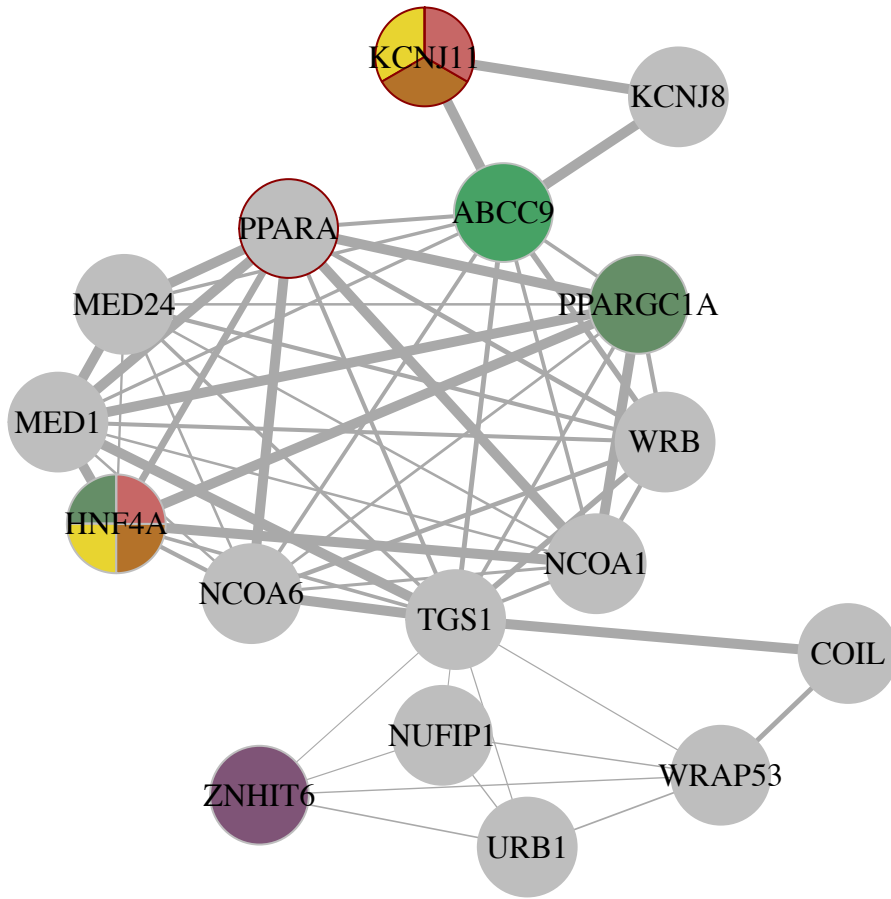

Emperical P-value:  $1e-04$   
Number of genes in complex: 17  
Top coordinated expressed tissues: islet, Vagina, Cervix Uteri  
Node color based on: Islet diabetic phenotype gene sets

### Complex-17

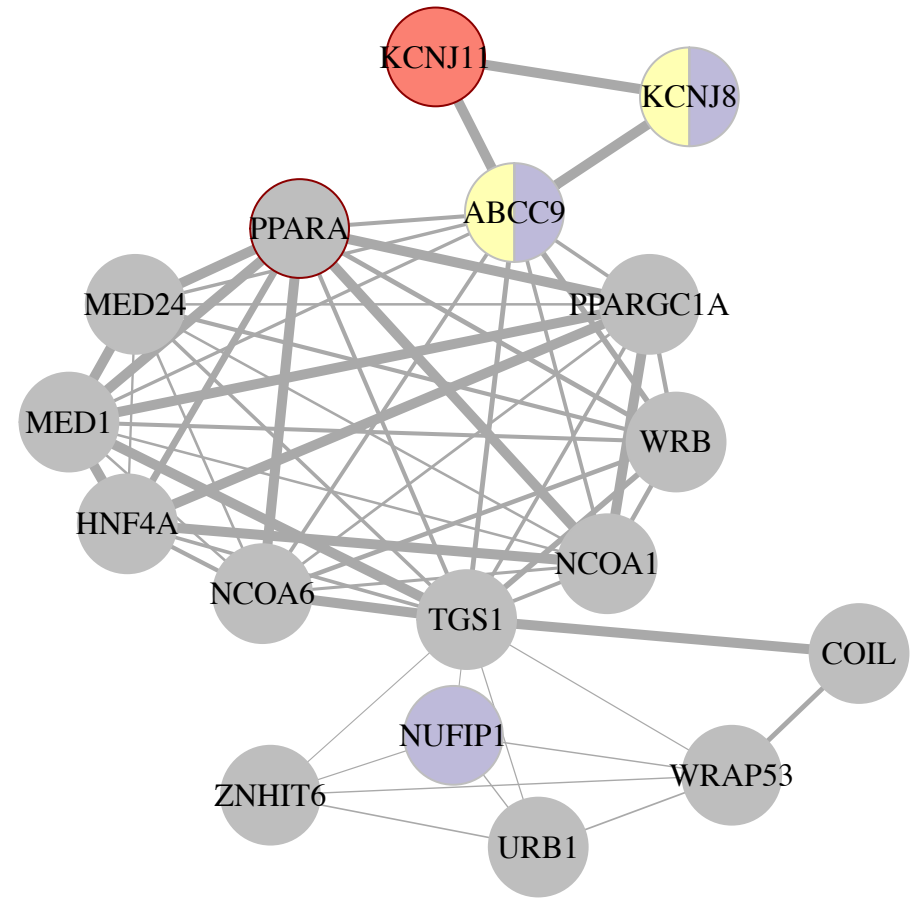

Emperical P-value:  $1e-04$   
Number of genes in complex: 17  
Top coordinated expressed tissues: islet, Vagina, Cervix Uteri  
Node color based on: Islet biology gene sets

### Complex-18

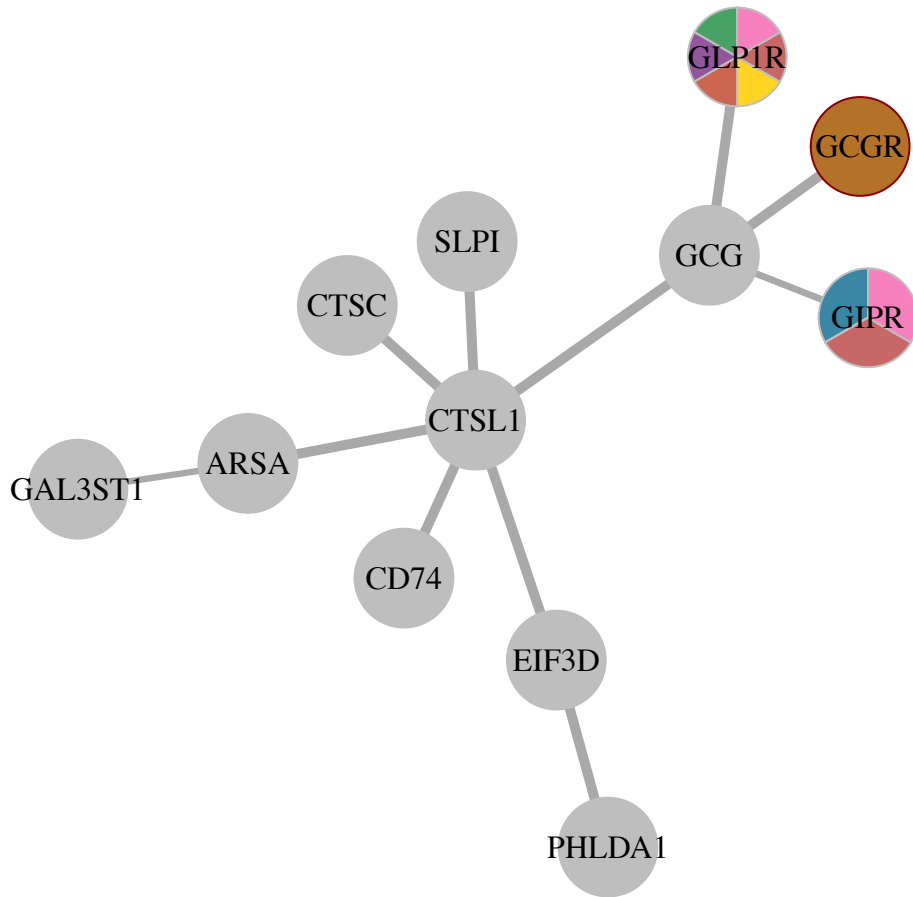

Emperical P-value: 0.00011  
Number of genes in complex: 12  
Top coordinated expressed tissues: Blood Vessel, Nerve, Thyroid  
Node color based on: Islet diabetic phenotype gene sets

### Complex-18

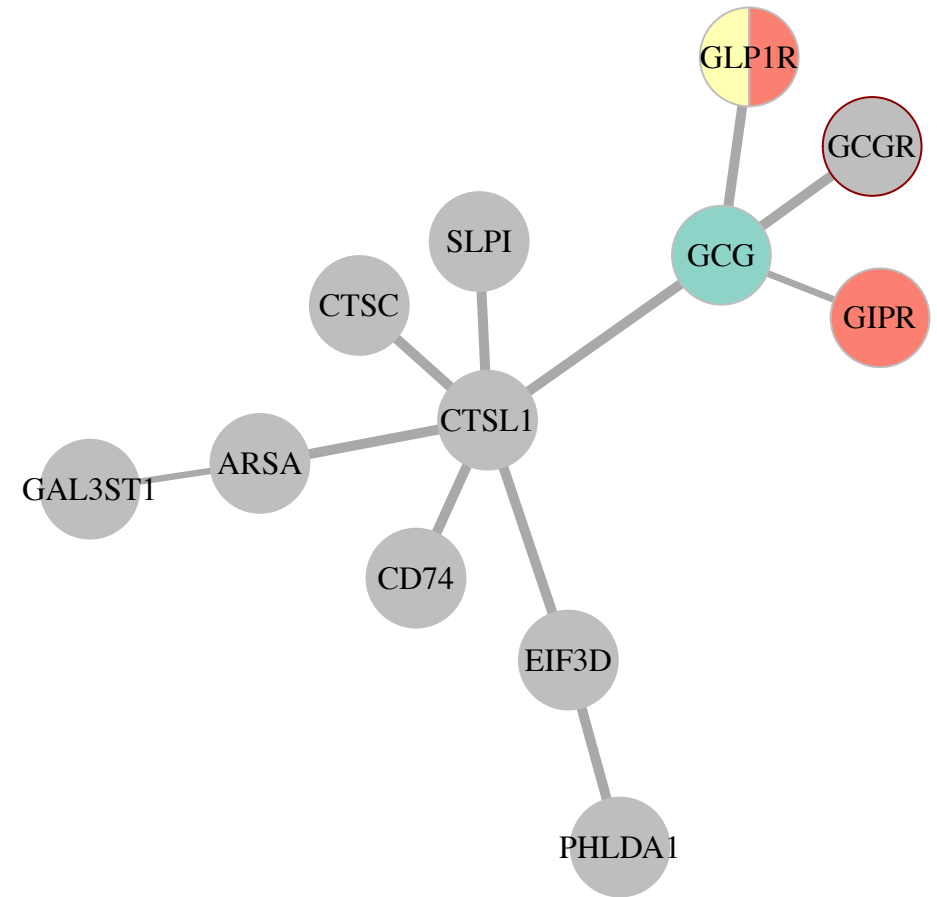

Emperical P-value: 0.00011  
Number of genes in complex: 12  
Top coordinated expressed tissues: Blood Vessel, Nerve, Thyroid  
Node color based on: Islet biology gene sets

### Complex-19

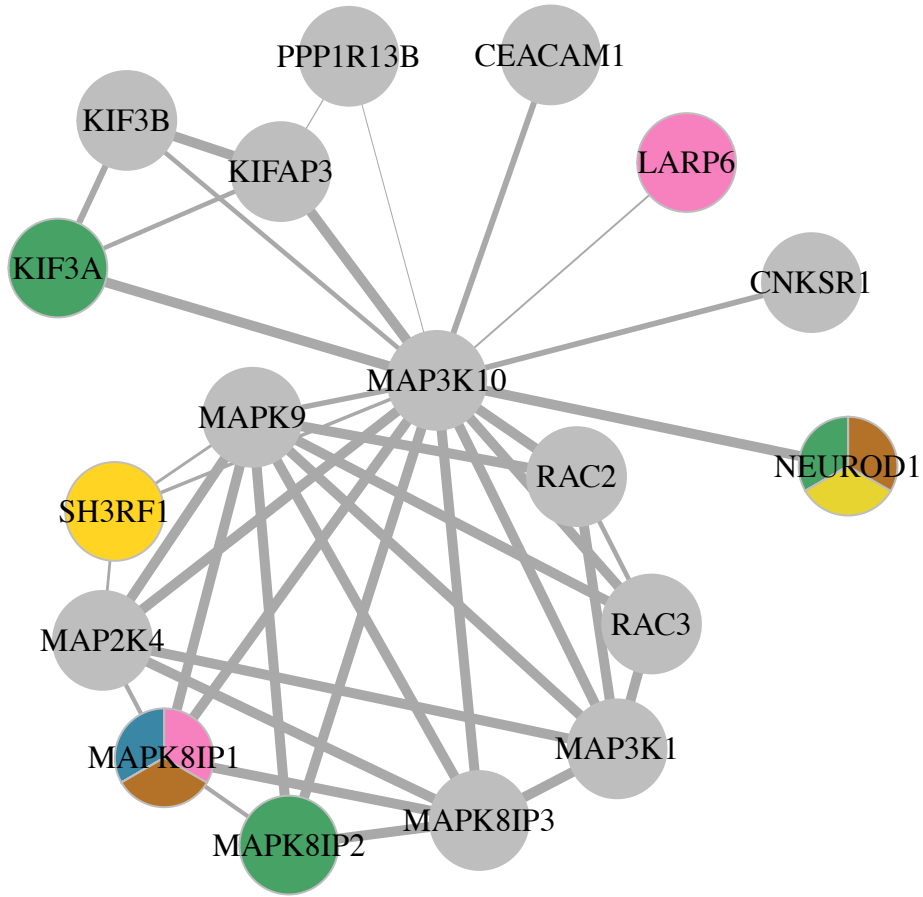

Emperical P-value: 0.00011  
Number of genes in complex: 18  
Top coordinated expressed tissues: Adrenal Gland, Prostate, Liver

Node color based on: Islet diabetic phenotype gene sets

### Complex-19

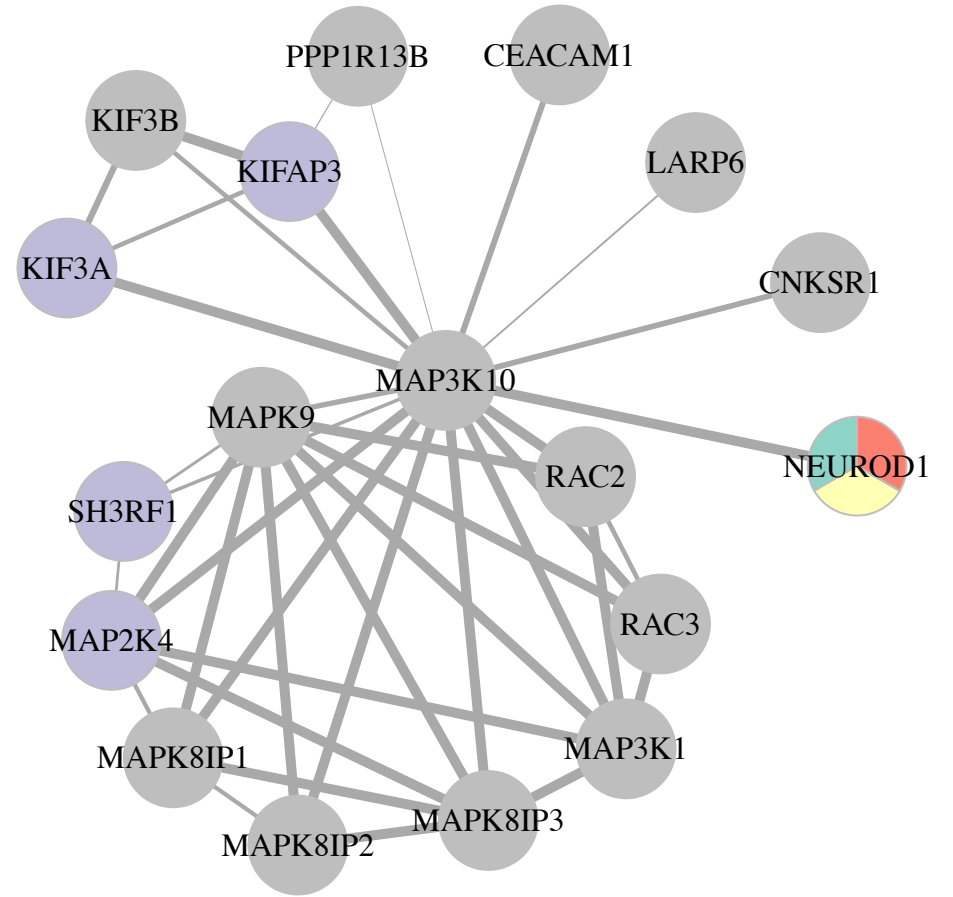

Emperical P-value: 0.00011  
Number of genes in complex: 18  
Top coordinated expressed tissues: Adrenal Gland, Prostate, Liver

Node color based on: Islet biology gene sets

### Complex-20

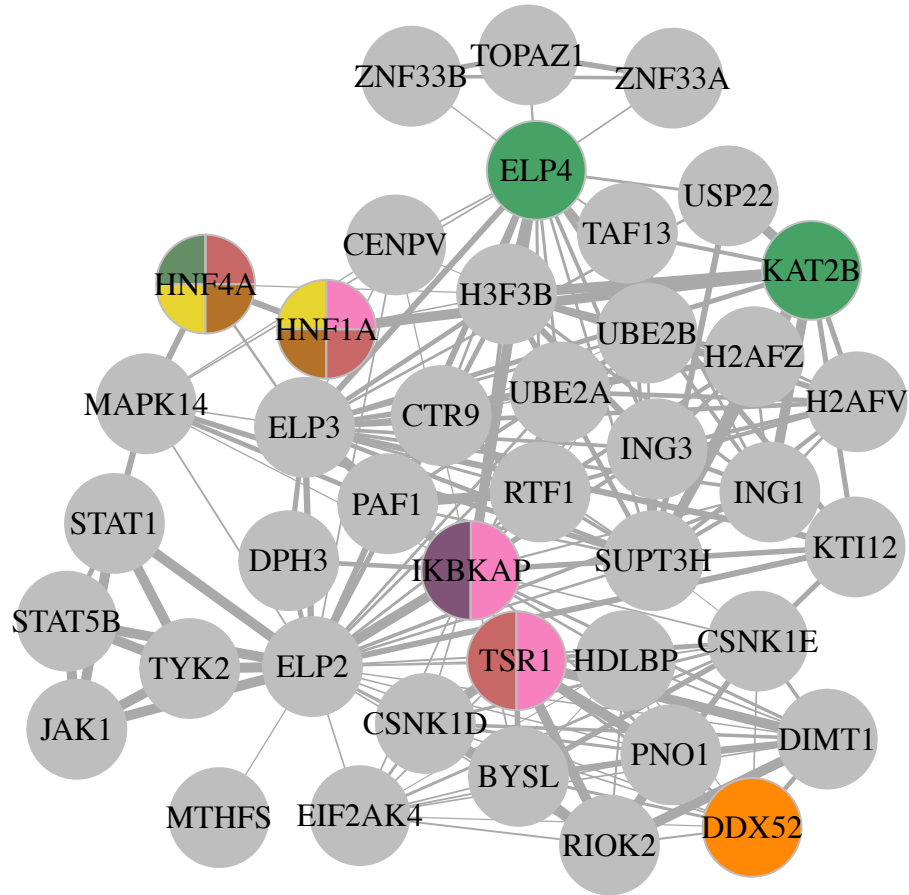

Emperical P-value: 0.00012  
Number of genes in complex: 42  
Top coordinated expressed tissues: Brain, Heart, Cervix Uteri  
Node color based on: Islet diabetic phenotype gene sets

### Complex-20

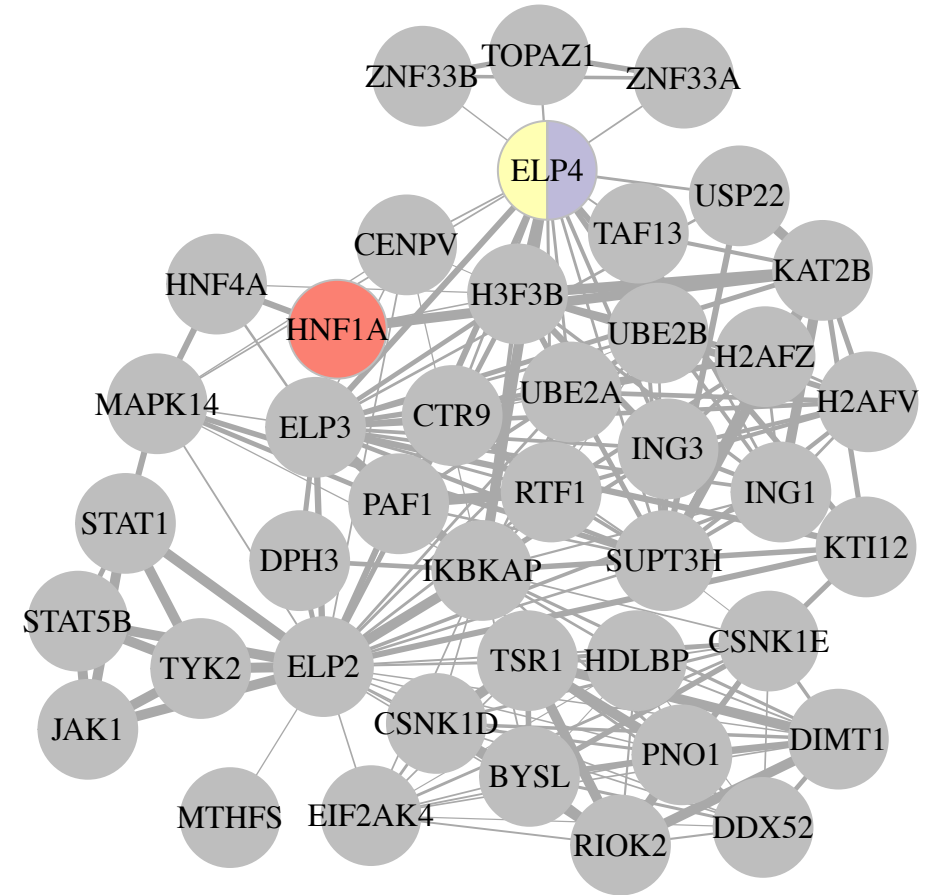

Emperical P-value: 0.00012  
Number of genes in complex: 42  
Top coordinated expressed tissues: Brain, Heart, Cervix Uteri  
Node color based on: Islet biology gene sets

### Complex-21

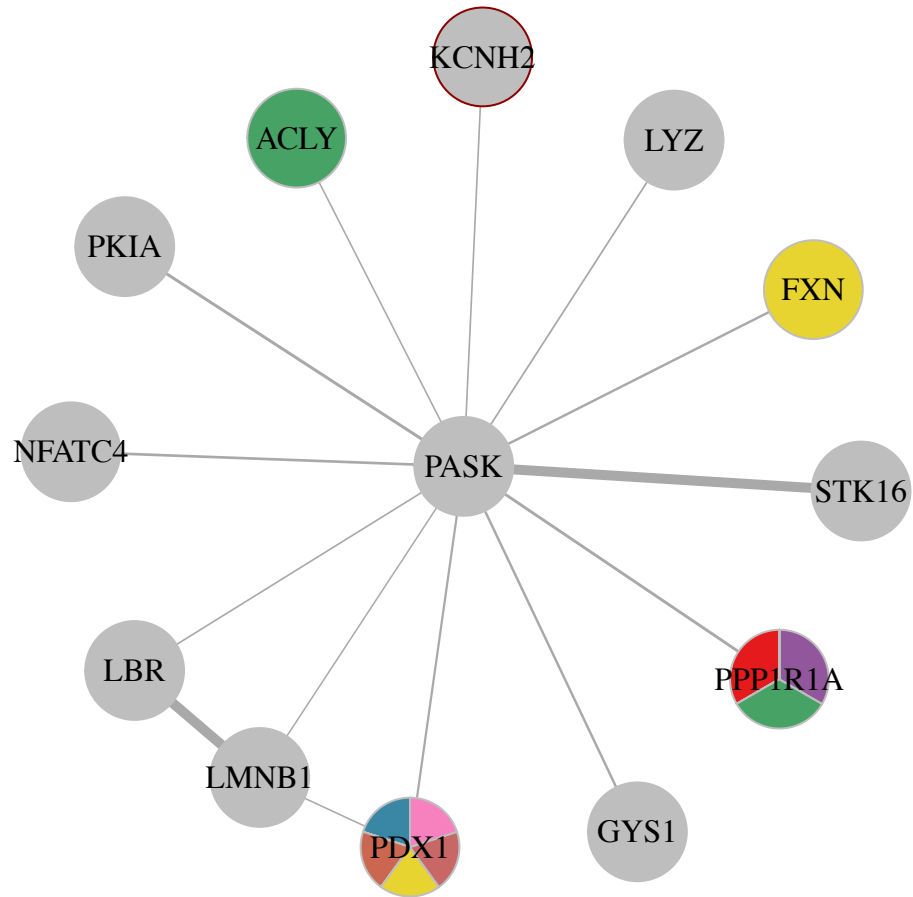

Emperical P-value: 0.00018  
Number of genes in complex: 13  
Top coordinated expressed tissues: Pituitary, Spleen, Liver  
Node color based on: Islet diabetic phenotype gene sets

### Complex-21

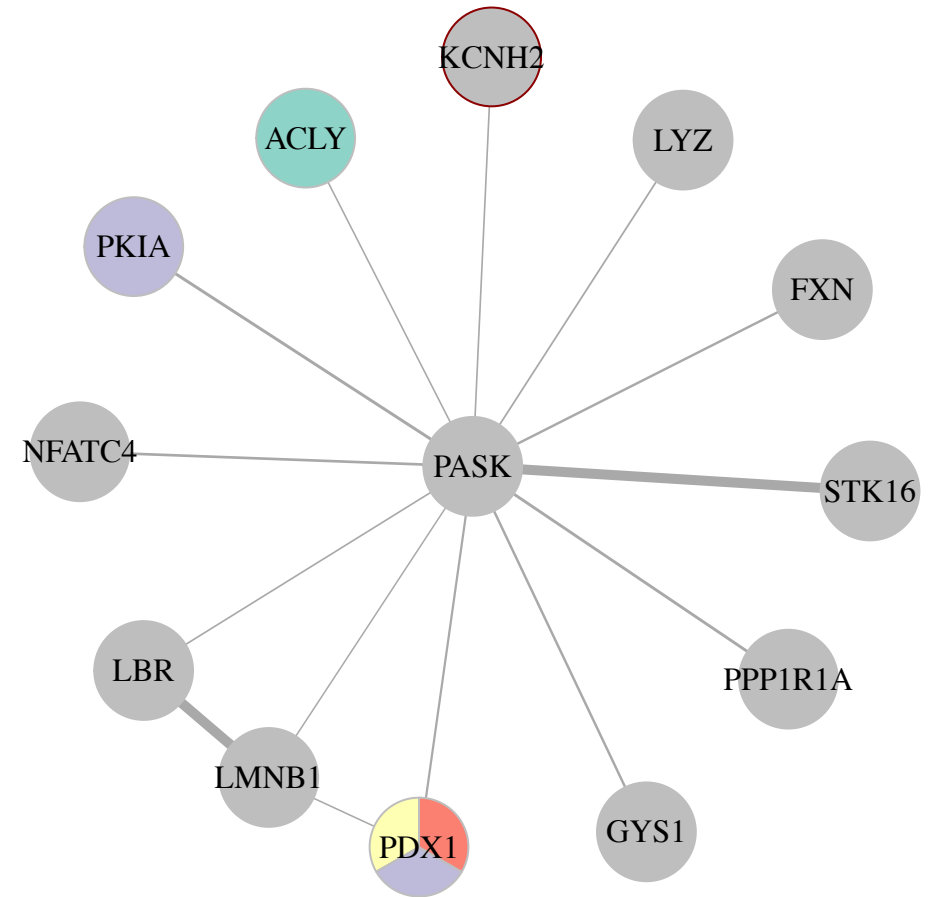

Emperical P-value: 0.00018  
Number of genes in complex: 13  
Top coordinated expressed tissues: Pituitary, Spleen, Liver  
Node color based on: Islet biology gene sets

### Complex-22

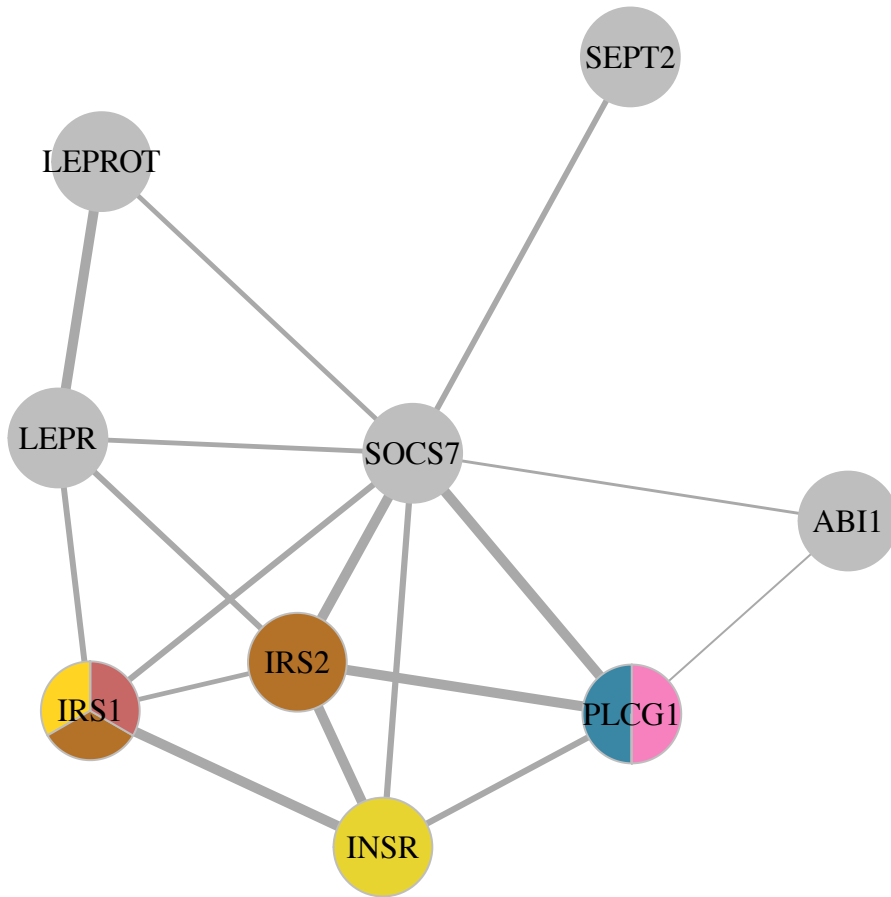

Emperical P-value:  $2e-04$   
Number of genes in complex: 9  
Top coordinated expressed tissues: Ovary, nonbeta, Colon  
Node color based on: Islet diabetic phenotype gene sets

### Complex-22

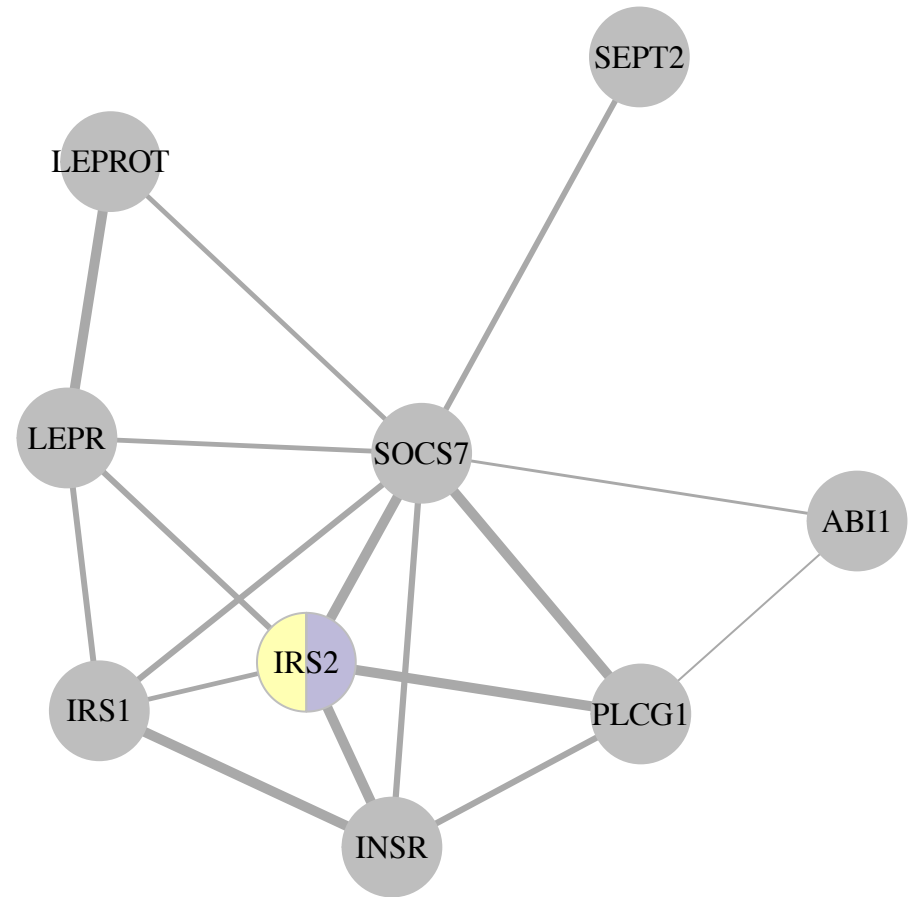

Emperical P-value:  $2e-04$   
Number of genes in complex: 9  
Top coordinated expressed tissues: Ovary, nonbeta, Colon  
Node color based on: Islet biology gene sets

### Complex-23

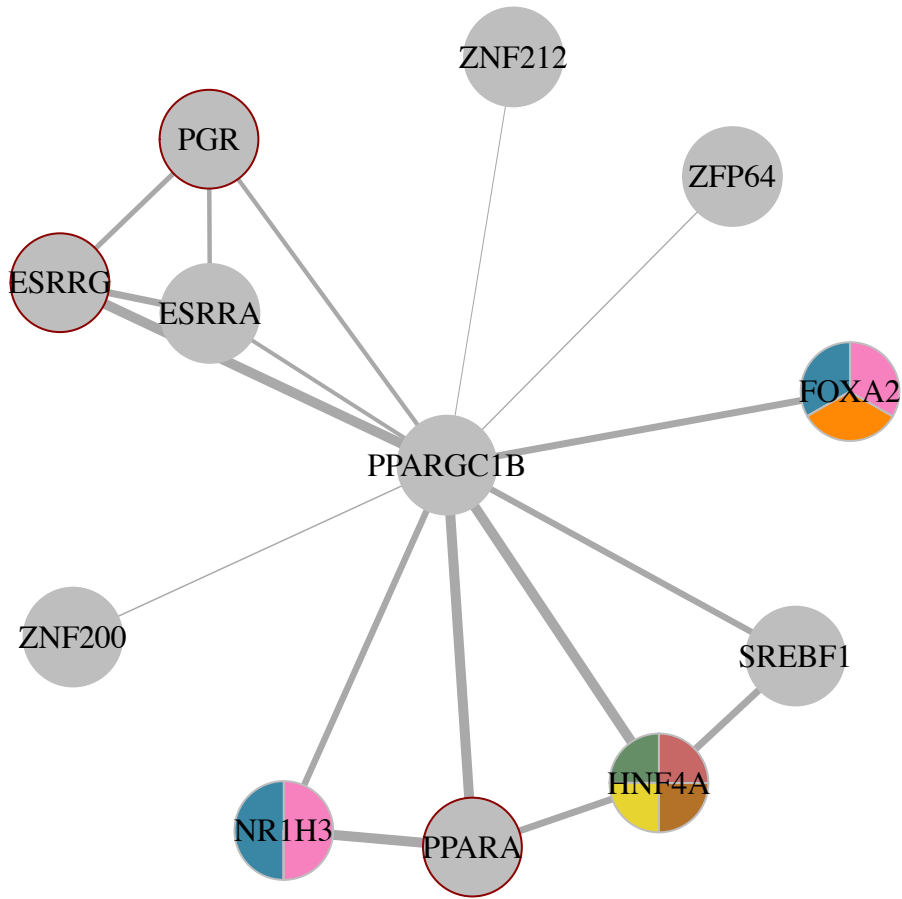

Emperical P-value: 0.00024  
Number of genes in complex: 12  
Top coordinated expressed tissues: Skin, beta, Colon

Node color based on: Islet diabetic phenotype gene sets

### Complex-23

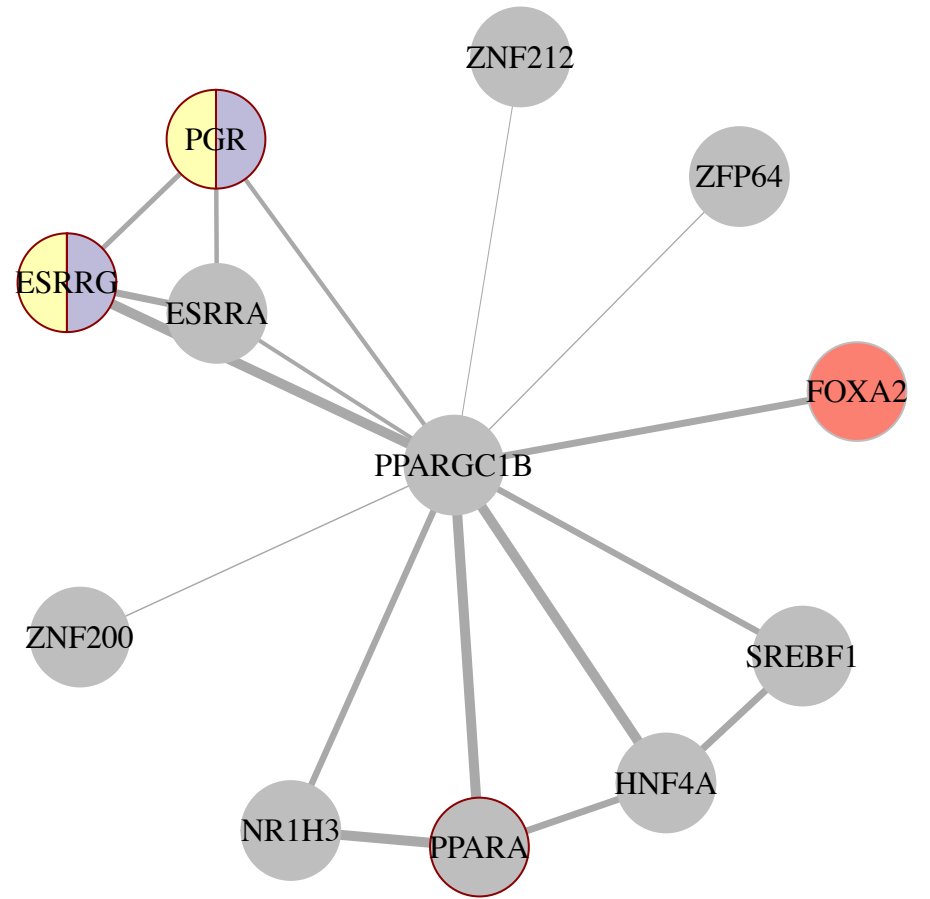

Emperical P-value: 0.00024  
Number of genes in complex: 12  
Top coordinated expressed tissues: Skin, beta, Colon

Node color based on: Islet biology gene sets



### Complex-24

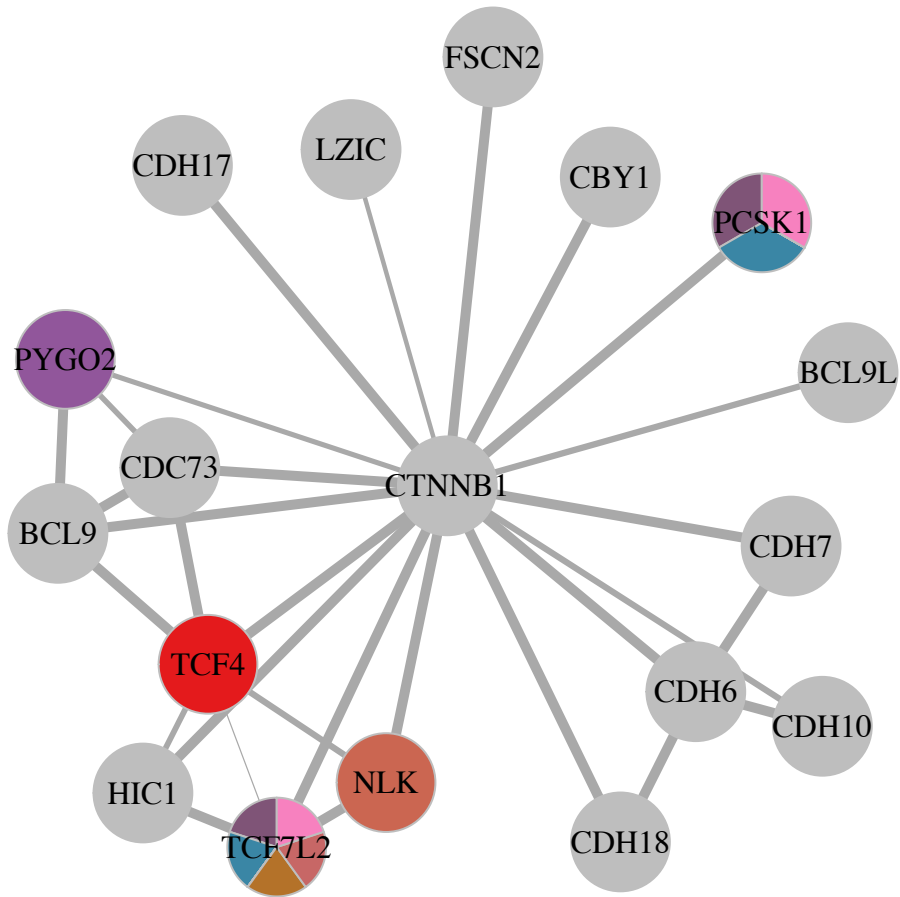

Emperical P-value: 0.00028  
Number of genes in complex: 18  
Top coordinated expressed tissues: Cervix Uteri, Vagina, Stomach

Node color based on: Islet diabetic phenotype gene sets

### Complex-24

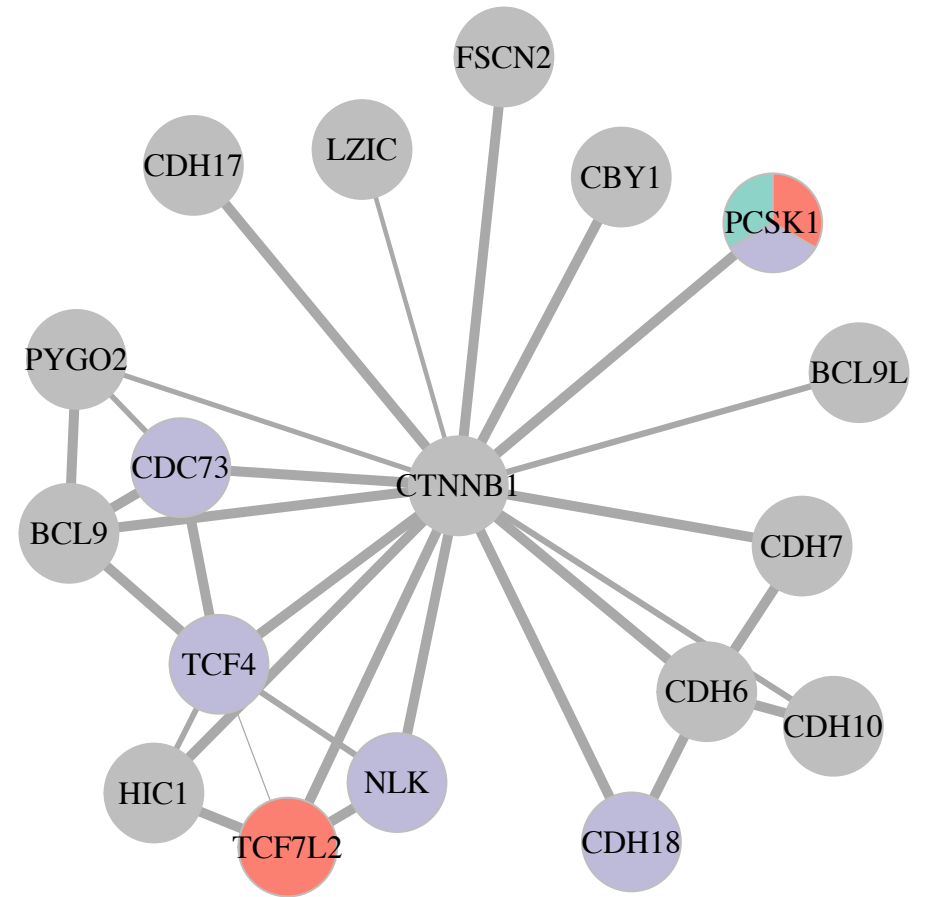

Emperical P-value: 0.00028  
Number of genes in complex: 18  
Top coordinated expressed tissues: Cervix Uteri, Vagina, Stomach

Node color based on: Islet biology gene sets
